1 **Metabolic response to point mutations reveals principles of modulation of *in vivo* enzyme**  
2 **activity and phenotype**

3  
4 Sanchari Bhattacharyya<sup>a</sup>, Shimon Bershtein<sup>b</sup>, Bharat V. Adkar<sup>a</sup>, Jaie Woodard<sup>a</sup> and Eugene I.  
5 Shakhnovich<sup>a\*</sup>

6  
7 <sup>a</sup>Department of Chemistry and Chemical Biology, Harvard University, 12 Oxford St, Cambridge,  
8 MA 02138

9 <sup>b</sup>Department of Life Sciences, Ben-Gurion University of the Negev, POB 653, Beer-Sheva  
10 8410501, Israel

11  
12 \*Correspondence should be addressed to E.I.S. ([shakhnovich@chemistry.harvard.edu](mailto:shakhnovich@chemistry.harvard.edu))  
13  
14

15 **Abstract**

16 The relationship between sequence variation and phenotype is poorly understood. Here we use  
17 metabolomic analysis to elucidate the molecular mechanism underlying the filamentous phenotype  
18 of *E. coli* strains that carry destabilizing mutations in the Dihydrofolate Reductase (DHFR). We  
19 find that partial loss of DHFR activity causes SOS response indicative of DNA damage and cell  
20 filamentation. This phenotype is triggered by an imbalance in deoxy nucleotide levels, most  
21 prominently a disproportionate drop in the intracellular dTTP. We show that a highly cooperative  
22 (Hill coefficient 2.5) *in vivo* activity of Thymidylate Kinase (Tmk), a downstream enzyme that  
23 phosphorylates dTMP to dTDP, is the cause of suboptimal dTTP levels. dTMP supplementation  
24 in the media rescues filamentation and restores *in vivo* Tmk kinetics to almost perfect Michaelis-  
25 Menten, like its kinetics *in vitro*. Overall, this study highlights the important role of cellular  
26 environment in sculpting enzymatic kinetics with system level implications for bacterial  
27 phenotype.

28

29

## 30 **Introduction**

31 Understanding genotype-phenotype relationship is a central problem in modern biology.  
32 Mutations affect various layers of cellular organization, the mechanistic details of which remain  
33 far from being understood. Mutational effects propagate up the ladder of cellular organization from  
34 physico-chemical properties of biomolecules, up to cellular properties by altering the way proteins  
35 and nucleic acids function and interact with other cellular components. At the next level of  
36 hierarchy, mutations affect systems level properties, like the epigenome, transcriptome, proteome,  
37 metabolome or the microbiome. Collectively all layers in this multi-scale genotype-phenotype  
38 relationship dictates the fitness/phenotypic outcome of the mutations at the organism level. It has  
39 been shown , using the concept of a biophysical fitness landscape, that it is possible to predict  
40 fitness effects of mutations from a knowledge of molecular and cellular properties of biomolecules  
41 <sup>1-4</sup> as well as using systems level properties like proteomics and transcriptomics <sup>5,6</sup>. The  
42 metabolome which is represented by the metabolite profile of the cell, is a more recent  
43 advancement in the -omics technology <sup>7</sup>. Metabolites represent end products of biochemical  
44 pathways; hence they are downstream to other -omics data, and therefore closest to the phenotype.  
45 Hence metabolomics is widely recognized now as an important stepping-stone to relate genotype  
46 to phenotype <sup>8-16</sup>. In the recent past, high-throughput studies have been dedicated to understanding  
47 how genetic variations lead to changes in metabolic profile of the cell <sup>17,18</sup>. Though vast knowledge  
48 is available in terms of how mutations perturb metabolite levels either in the local vicinity or distant  
49 in the network, a mechanistic knowledge of how such changes modulate phenotypic outcomes is  
50 lacking.

51 In this work, we use targeted metabolomics to understand the mechanistic basis of how  
52 destabilizing mutations in the essential core metabolic enzyme of *E. coli* Dihydrofolate Reductase  
53 cause pronounced (>10 times of the normal cells) filamentation of bacteria. DHFR catalyzes  
54 conversion of dihydrofolate to tetrahydrofolate, which is an essential one-carbon donor in purine,  
55 pyrimidine and amino acid biosynthesis pathways. Metabolomics analyses reveal that filamentous  
56 mutant DHFR strains incurred a sharp drop in thymidine mono-, di- and tri-phosphate (dTMP,  
57 dTDP and dTTP), the latter being a deoxyribonucleotide that is essential for DNA synthesis and  
58 cell division. This results in DNA damage, upregulation of SOS response, and filamentation. We  
59 found that even though mutant strains have low dTMP levels, the disproportionately low levels of  
60 dTDP (and hence dTTP) arise primarily due to the strongly cooperative *in vivo* activity of the

61 downstream essential pyrimidine biosynthesis enzyme Thymidylate Kinase (Tmk), which  
62 phosphorylates dTMP to dTDP. This is in stark contrast to its Michaelis-Menten (MM) activity  
63 profile observed *in vitro*. Surprisingly, supplementation of external dTMP in the medium which  
64 rescues *in vivo* dTDP levels and filamentation, switches the *in vivo* Tmk activity curves to the  
65 conventional ‘*in vitro* like’ MM kinetics. The cooperative enzyme activity is best explained by the  
66 fractal nature of Tmk activity *in vivo* due to diffusion-limitation of substrate dTMP, possibly due  
67 to substrate channeling and metabolon formation. Overall, this study highlights the pleiotropic  
68 nature of mutations and way in which the complex cellular environment and metabolic network  
69 modulates *in vivo* enzyme activity and organismal fitness.

## 70 **Results**

### 71 ***Several chromosomal mutations in folA gene give rise to slow growth and filamentation of E. coli***

72 Earlier we had designed a group of highly destabilizing chromosomal DHFR mutations in *E. coli*  
73 MG1655 (W133V, V75H+I155A, I91L+W133V, and V75H+I91L+I155A) that cause very slow  
74 growth at 37°C and 42°C (<sup>19,20</sup> and Figure 1A, see Methods for details about the strains). To  
75 understand the effects of these mutations on bacterial morphology, we grew mutant DHFR strains  
76 under two different growth conditions: M9 minimal media without and with supplementation with  
77 casamino acids (mixtures of all amino acids, except tryptophan, see *Methods*). In minimal media,  
78 median cell lengths of some mutants (W133V and V75H+W133V at 42°C) were smaller compared  
79 to WT, while I91L+W133V (at 40°C) was marginally longer than WT (Figure 1B). However, when  
80 M9 minimal medium was supplemented with amino acids, we found that cells carrying these  
81 mutations were pronouncedly filamentous. Figure 1C, D shows live cell DIC images of wild-type  
82 (WT) and I91L+W133V mutant DHFR strains at 30°C, 37°C, and 42°C (40°C for I91L+W133V  
83 strain). (See Supplementary Figure S1 for images of other low fitness mutant strains). In parallel to  
84 the detrimental effect of temperature on fitness, we noted that the morphologies were also  
85 temperature-sensitive. I91L+W133V and V75H+I91L+I155A strains exhibited a 1.5-1.75 fold  
86 increase (comparatively to WT) in the average cell length at 37°C (Figure 1E), while W133V and  
87 V75H+I155A were not elongated at 37°C. The latter, however, showed an increase up to 2.0-2.3 fold  
88 over WT cell lengths at 42°C (Figure 1F). Strains I91L+W133V and V75H+I91L+I155A showed  
89 1.8-2.0 fold increase in the average cell length at 40°C, with some cells reaching up to 20µm in length

90 (about 10 fold increase) (Figure S1). Besides temperature of growth, since filamentation was also  
91 strongly dependent on availability of amino acids in the growth medium, it seemed likely that it was  
92 the result of a metabolic response due to partial loss of DHFR function.

### 93 ***Filamentation is due to drop in DHFR activity***

94 DHFR is a central metabolic enzyme that is involved in conversion of dihydrofolate to  
95 tetrahydrofolate, and the latter is an important 1-carbon donor in the biosynthesis of purines,  
96 pyrimidines, and certain amino acids like glycine and methionine. Earlier we had reported that these  
97 mutant DHFR strains had very low abundance of the mutant proteins in the cell (<sup>6,19</sup> and Figure S2),  
98 an effect that could be rescued by deletion of Lon protease or by over-expressing chaperones like  
99 GroEL-ES <sup>19</sup>. We, therefore, reasoned that filamentation could be a result of drop in DHFR activity  
100 in these cells. To confirm this, we supplemented the *E. coli* strains carrying chromosomal DHFR  
101 mutations with WT DHFR expressed from a plasmid and found that both filamentation (Figure 2A)  
102 and growth defects (Figure 2B) were fully rescued. On the WT background, expression of extra  
103 DHFR resulted in some elongation, presumably due to toxicity of DHFR over-expression <sup>15</sup>. We also  
104 found that plasmid expression of mutant proteins in WT cells did not result in any filamentation  
105 (Figure 2C) or growth defects (Figure 2D). This shows that filamentation is not due to toxicity of the  
106 mutant DHFR proteins. We also found that treatment of WT cells with Trimethoprim, an antibiotic  
107 that targets bacterial DHFR, also caused filamentation at concentrations near the MIC (1µg/ml). At  
108 higher concentrations of the drug, there is growth arrest, hence no filamentation, leading to a non-  
109 monotonic dependence of cell length on TMP concentration (Figure S4A, B at 37°C and 42°C  
110 respectively).

### 111 ***Filamentous strains exhibit imbalance between dTTP and other deoxyribonucleotides***

112 Here we aimed to determine metabolic changes in mutant strains associated with filamentous  
113 phenotype. To that end we carried out metabolomics analysis of mutant strains under conditions of  
114 filamentation (in amino acid supplemented M9 medium at 42°C for WT and W133V, at 40°C for  
115 I91L+W133V, at lower concentration of TMP, close to MIC which exhibited pronounced elongation  
116 phenotype) as well as under non-filamentation conditions (in minimal medium at 42°C for WT and  
117 W133V and at 40°C for I91L+W133V and in the absence of amino acids for all strains).

118 We observed that in the absence of amino acids, *when the cells are not filamented* mutant  
119 strains as well as WT cells treated with 1µg/ml TMP (close to MIC) exhibited very low levels of  
120 both purines and pyrimidines (Figure 3A, Figure S5A, B; Table S1). For example, in strain  
121 I91L+W133V, IMP, AMP and dTMP levels were respectively 17%, 30% and 5% of WT levels,  
122 while dTTP levels were below the detection limit. Methionine and glycine biosynthesis require  
123 tetrahydrofolate derivatives, hence, expectedly, methionine levels were only 1-3% in mutant strains  
124 (Figure 3B, Figure S5A,B). Overall, we conclude that large drop in methionine and purine (IMP)  
125 levels presumably stalls protein/RNA synthesis. Since increase in cell mass is essential for  
126 filamentation, cells under this condition are not filamented.

127 In the presence of 1% casamino acids, several but not all amino acids showed a marked  
128 increase in abundance (Figure 3D, Figure S5 and Table S1). Methionine levels rose to 40% of WT  
129 levels for I91L+W133V mutant, while aspartate/asparagine, glutamine, histidine and tryptophan  
130 levels also showed a significant increase. Particularly interesting was the fact that purine levels were  
131 substantially rescued upon addition of amino acids (Figure 3C, Figure S5A,B). IMP showed the  
132 maximal effect, increasing 10-15 fold over its levels in the absence of amino acids. ATP, ADP, AMP  
133 and GMP also showed similar trends. Since the product of DHFR is eventually used in the synthesis  
134 of methionine, IMP and dTMP (Figure S6A), we hypothesize that addition of methionine in the  
135 medium allows higher amounts of 5,10-methylene-THF to be channeled towards synthesis of purines  
136 and pyrimidines. Moreover, both de novo purine and pyrimidine biosynthesis pathways require  
137 aspartate and glutamine (Figure S6B, C), which were otherwise low in minimal medium. Overall,  
138 the metabolomics data suggest that in the presence of added amino acids, protein, and RNA synthesis  
139 are no longer stalled, and therefore growth, which is pre-requisite for filamentation, can happen.

140 Though dTMP levels increased to about ~10% of WT levels in I91L+W133V and ~50% in  
141 W133V, surprisingly, dTTP levels (thymidine derivative that is incorporated in the DNA) were only  
142 about 1% of WT levels in I91L+W133V and 18% for W133V (Figure 3C, Figure S5A, B). In  
143 contrast, dATP and dCTP levels were very high (Figure 3C, Figure S5A, B). We hypothesize that as  
144 cellular growth continues, misbalance in the concentrations of deoxy nucleotides may lead to  
145 erroneous DNA replication, induction of SOS response and blocked cell division. Indeed, in our  
146 previous study, proteomics and transcriptomics analyses showed that several SOS response genes  
147 were upregulated in I91L+W133V and V75H+I91L+I155A strains at 37°C <sup>6</sup>.

148 ***Filamentation and SOS response: Deletion of recA rescues filamentation***

149 We quantified the expression of several SOS genes *recA*, *recN* and *sulA* under different  
150 supplementation conditions for mutant DHFR strains as well as TMP-treated WT cells. Mutants  
151 grown at low temperature and those grown in the absence of amino acids were not elongated, and  
152 not surprisingly, they did not elicit any SOS response (Figure 4A-C). In comparison, for all  
153 conditions that are associated with filamentation (I91L+W133V mutant at 37°C, W133V and  
154 I91L+W133V at 42°C) induced strong SOS response (Figure 4A-C). The levels of induction of these  
155 genes were greatly reduced in the presence of dTMP, consistent with lack of filamentation under this  
156 condition (Figure 4A-C). Similar trends were also observed for WT treated with TMP.

157 Overexpression of RecA is the key trigger of the SOS response to DNA damage. RecA  
158 cleaves the dimeric LexA repressor to turn on the genes that are under the SOS box (e.g., *sulA*, *uvr*  
159 *proteins, etc.*). *SulA* inhibits the cell division protein FtsZ, eventually causing filamentation. To  
160 understand the role of *recA* and *sulA* in our study, we treated  $\Delta recA$  and  $\Delta sulA$  strains with near-MIC  
161 levels of the antibiotic TMP. As expected,  $\Delta recA$  strain did not show filamentation upon TMP  
162 treatment (Figure 4D), clearly highlighting its definitive role in filamentation. However,  $\Delta sulA$  strain  
163 continued to filament (Figure 4D), suggesting possible role of *sulA*-independent pathways. This data,  
164 however, does not negate out the role of *sulA*, since *sulA* is highly upregulated in mutant strains and  
165 is a well-known inhibitor of the cell division protein FtsZ. A poorly characterized segment of the  
166 *E. coli* genome called the e14 prophage that harbors the *sfiC* gene has been implicated to play a role  
167 in SOS dependent but *sulA* independent filamentation<sup>21</sup>. We found that a mutant *E. coli* has been  
168 knocked out for the e14 region does not filament upon TMP treatment (Figure 4D), indicating that  
169 *sfiC* might be one of the players involved in elongation. Overall, these results clearly establish the  
170 role of the SOS pathway towards filamentation in mutant DHFR strains, which in turn is due to  
171 imbalance between dTTP and other deoxynucleotides in the cell.

172 ***Filamentation in mutant DHFR strains is not due to TLD and is reversible***

173 To find out if mutant strains represented a case of thymineless death (TLD), a condition that causes  
174 extensive filamentation due to extreme thymine deprivation<sup>22</sup>, we assessed the viability of mutant  
175 strains at 30°C (permissive temperature) on solid media after several hours of growth at 42°C  
176 (restrictive temperature) in the presence of amino acids (filamentation condition). Sangurdekar *et al*  
177<sup>23</sup> reported exponential loss in viability in TLD after one hour of growth under thymineless

178 conditions. The idea was that if cells underwent TLD under conditions of filamentation, they would  
179 no longer be able to resume growth/form colonies at permissive temperature. To that end, we induced  
180 filamentous phenotype by incubating W133V mutant cells for 4 hours at 42°C, and then monitored  
181 cell recovery at room temperature (see *Methods*). Figure 5A shows a representative example of  
182 morphology of W133V filament that begins to undergo slow division initiated at the poles at  
183 permissive temperature. Most progeny cells of normal size appeared after 5-6 hours of growth at low  
184 temperature, indicating no loss in viability.

185 Earlier studies have shown that inhibition of DHFR activity by Trimethoprim (TMP) under  
186 conditions of both amino acids and purine supplementation leads to TLD<sup>24</sup>. We found that WT cells  
187 that were subjected to *very high* TMP concentrations showed loss of colony forming units on media  
188 supplemented with *both* amino acids and a purine source (GMP), indicating death (Figure 5C),  
189 similar to<sup>24</sup>, while supplementation with only amino acids was bacteriostatic (Figure 5B). Since  
190 mutant DHFR strains incur only *partial* loss of DHFR activity, they resemble lower concentrations  
191 of TMP treatment, and therefore did not show any substantial loss in colony forming units when  
192 grown in the presence of amino acids and GMP (Figure 5D). Collectively, these experiments  
193 demonstrated that despite extensive DNA damage and filamentation, mutant cells did not represent  
194 a case of TLD.

### 195 ***Supplementation of dTMP in the medium restores dTDP/dTTP levels and rescues filamentation***

196 Since mutant strains had very low dTMP/dTTP levels, we grew WT and mutant strains in minimal  
197 medium that was supplemented with both amino acids and 1mM dTMP and carried out measurement  
198 of cell length as well as metabolomics analysis. Addition of dTMP largely rescued filamentation of  
199 mutant strains (Figure 6A). Metabolomics analyses showed that under this condition, I91L+W133V  
200 mutant had much higher levels of both dTDP and dTTP relative to WT (Figure 6B). Concentration  
201 of the other deoxyribonucleotides dATP/dCTP levels however, remained high despite addition of  
202 dTMP (Figure 6B). Therefore, we conclude that higher amounts of dTTP presumably reduce the  
203 imbalance in relative concentrations of deoxy-nucleotides, thus relieving DNA damage and  
204 filamentation (see above).

205 Moreover, supplementation of dTMP and amino acids also allowed mutants W133V, I91L+W133V  
206 and V75H+I91L+I155A to form higher counts of colony forming units (cfu) than with only amino  
207 acids at their respective filamentation temperatures (Figure 6C shows images for V75H+I91L+I155A

208 at 40°C). However, we note that cfu count for mutants in the presence of dTMP were still orders of  
209 magnitude lower than those of WT, indicating that thymine only rescues cell length, and not growth  
210 defects. This was also supported by the absence of growth rate rescue with dTMP (Figure 6D).

### 211 ***Low dTDP/dTMP ratio: possibility of inhibition of Thymidylate Kinase?***

212 Interestingly, we found that while dTMP levels are low in mutant DHFR strains (10% and 50% of  
213 WT levels in I91L+W133V and W133V mutants respectively), dTDP levels were far lower (1% and  
214 20%) (Figure 3C, Figure S5A). On the other hand the ratios of dTDP to dTTP were approximately  
215 equivalent in both WT and mutants. Supplementation of dTMP in the medium however, restores the  
216 relative abundances of dTMP to dTDP to dTTP to approximately WT level in I91L+W133V (Figure  
217 6B). It raises the possibility that the pyrimidine biosynthesis pathway enzyme Thymidylate Kinase  
218 (Tmk), which phosphorylates dTMP to dTDP, might be inhibited in mutant DHFR strains. Previous  
219 reports suggest that dUMP and dCTP can act as competitive inhibitors for Tmk<sup>25</sup>, and interestingly,  
220 we found that both dUMP and dCTP levels were highly upregulated in mutant cells (Figure 3C), due  
221 to inefficient conversion of dUMP to dTMP when DHFR activity was reduced (Figure S6C). To find  
222 out if intracellular accumulation of dUMP and dCTP in mutant cells is sufficient to inhibit Tmk, we  
223 overexpressed and purified his-tagged Tmk from *E. coli* cells and tested the potential inhibitory effect  
224 of dUMP and dCTP *in vitro*. In comparison to its cognate substrate dTMP for which the  $K_M$  is 13 $\mu$ M  
225 (Figure 7A), the  $K_M$  for dUMP is 450 $\mu$ M (Figure S7A), which indicates that dUMP is a much weaker  
226 substrate as compared to dTMP. The apparent  $K_I$  of dUMP for Tmk was 3.9mM (Figure S7B). Given  
227 that dUMP concentration inside WT *E. coli* cells is 0.01mM<sup>26</sup>, its concentration inside mutant DHFR  
228 cells would be in the range of 0.5mM (50-fold higher levels), which is not enough to cause substantial  
229 inhibition of Tmk *in vivo*. We next carried out an activity assay of Tmk in the presence of varying  
230 amounts of dCTP. Depending on magnesium concentration, the  $K_I$  of dCTP ranged between 2-4 mM  
231 (Figure S7C). Considering intracellular dCTP concentration in WT cells to be 35 $\mu$ M<sup>7</sup>, those in  
232 mutant cells are about 0.7mM (20-fold overexpression). Hence, like dUMP, intracellular dCTP levels  
233 are too low to show any substantial inhibition of Tmk activity *in vivo*. To conclude, though dUMP  
234 and dCTP have the potential to inhibit Tmk activity, their concentrations inside mutant cells are not  
235 high enough to achieve that.

### 236 ***Cooperative of enzymatic activity of Tmk in vivo explains low dTDP levels***



237 As discussed previously, our metabolomics data shows that in mutant cells, dTDP levels fall  
238 far more precipitously than dTMP concentrations. If Tmk follows the same Michaelis-Menten (MM)  
239 like dependence on intracellular dTMP concentrations as seen *in vitro*, we find that dTDP levels  
240 would never drop as low as the experimentally observed value for mutants (Figure 7B, black line for  
241 I91L+W133V) for any assumed intracellular dTMP concentration for WT. To resolve this  
242 inconsistency, we attempted to elucidate the *in vivo* activity curve of Tmk enzyme from dTDP and  
243 dTMP levels measured from the metabolomics data for WT and mutant cells. To get a broad range  
244 of data, we measured metabolite levels for WT and several mutants at different time points during  
245 growth both in the absence and presence of different concentrations of external dTMP in the medium.  
246 Surprisingly, we found that the data points from our metabolomics experiments traced two different  
247 curves depending on whether there was external dTMP in the medium. Data points derived in the  
248 *absence* of external dTMP had a long lag, followed by a more cooperative increase (red points in  
249 Figure 7C), while the data points corresponding to added dTMP, appeared to follow the traditional  
250 MM curve (black data points in Figure 7C) and was similar to the enzyme activity of Tmk observed  
251 *in vitro*. We fitted both datasets to a Hill equation. For the conditions without added dTMP (red data  
252 points of Figure 7C) Hill-coefficient of 2.5 was obtained suggesting strong positive cooperativity.  
253 On the other hand, when dTMP was added, the dTDP vs dTMP curve (black datapoints in Figure  
254 7C) was fitted with a Hill coefficient of 1.2. However, the fit was not significantly different from the  
255 traditional MM model (p-value = 0.36). Based on the Hill-like curve in Figure 7C, we can say that  
256 for intracellular dTMP concentrations below 10 $\mu$ M, a 10% drop in dTMP levels (as seen for  
257 I91L+W133V) would cause dTDP levels to drop to 1% or less (Figure 7B, red line), largely because  
258 of the long lag. Therefore, a Hill-like dependence of Tmk activity on dTMP concentrations can  
259 explain the disproportionately low dTDP levels in mutant strains.

260 However, we note that metabolomics does not directly report on the kinetics of an enzyme *in*  
261 *vivo*. Rather, it reports on the steady state levels of metabolites present inside the cell at any given  
262 time. Moreover, unlike *in vitro* activity measurement conditions where an enzyme functions in  
263 isolation, *in vivo* Tmk is a part of the pyrimidine biosynthesis pathway that involves several  
264 sequentially acting enzymes as follows:

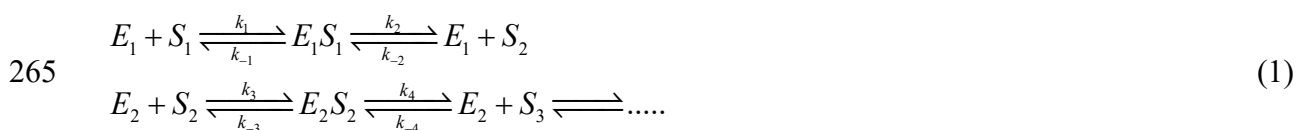

266 Where all metabolites ( $S_1, S_2, S_3, \dots$ ) are at steady state. Assuming that each enzyme in this pathway  
267 follows Michaelis-Menten kinetics and that the *product* of each enzyme has very low affinity to bind  
268 the enzyme back, we arrive at the following equation (see detailed derivation in the Supplementary  
269 Text):

$$270 \quad [S_2] = \frac{k_2 K_{M2} [E_1]_0 [S_1]}{k_4 K_{M1} [E_2]_0 + (k_4 [E_2]_0 - k_2 [E_1]_0) [S_1]} = \frac{A [S_1]}{B + C [S_1]} \quad (2)$$

271 Where  $A = k_2 K_{M2} [E_1]_0$ ,  $B = k_4 K_{M1} [E_2]_0$ ,  $C = (k_4 [E_2]_0 - k_2 [E_1]_0)$  and  $K_{M1}$  and  $K_{M2}$  are the  
272 Michaelis constants of enzymes  $E1$  and  $E2$  for  $S1$  and  $S2$ ,  $[E_i]_0$  is a total concentrations (i.e.  
273 free+bound) of an  $i$ -th enzyme. In other words, the steady state concentration of any product in  
274 the pathway follows a hyperbolic or MM like dependence on its substrate concentration, similar  
275 to the black curve (Figure 7C) obtained in the presence of external dTMP.

276 Next, we assume that Tmk (along with other enzymes in this pathway) follows a Hill-like  
277 kinetics (due to reasons we elaborate in the Discussion) in the following form:

$$278 \quad \text{Initial rate } v_0 = \frac{v_{\max} [S]^m}{K_M + [S]^m}, \text{ where ' } m \text{ ' is the Hill coefficient,}$$

279 then for the pathway of enzymes at steady state (as in Eq (1)),  $S2$  has the following dependence on  
280  $S1$ :

$$281 \quad [S_2]^n = \frac{k_2 K_{M2} [E_1]_0 [S_1]^m}{k_4 K_{M1} [E_2]_0 + (k_4 [E_2]_0 - k_2 [E_1]_0) [S_1]^m} = \frac{A [S_1]^m}{B + C [S_1]^m}, \text{ where ' } m \text{ ' and ' } n \text{ ' are the Hill}$$

282 coefficients of consecutive enzymes  $E1$  and  $E2$ .

$$283 \quad \text{Hence, } [S_2] = \left[ \frac{A [S_1]^m}{B + C [S_1]^m} \right]^{1/n} \quad (3)$$

284 As shown in Supplementary Text, the above equation gives rise to a Hill like dependence of  $S2$  on  
285  $S1$  with positive cooperativity, similar to the red curve (Figure 7C) obtained in the *absence* of  
286 external dTMP, with the assumption that  $m > n$ . The above analysis suggests that the dependence  
287 of the steady state concentrations of metabolites along the linear pathway on each other is reflective  
288 of the kinetics of the concerned enzyme *in vivo*, hence it is reasonable to infer that *in vivo* kinetics of  
289 Tmk is Hill-like under native conditions and MM like in the presence of added dTMP.

290 ***Supplementation of thymidine retains cooperative behavior of Tmk in vivo***

291 dTMP, the substrate of Tmk, comes from two different sources inside the cell: the *de novo*  
292 pyrimidine biosynthesis pathway through conversion of dUMP to dTMP by thymidylate synthase,  
293 and the pyrimidine salvage pathway through conversion of thymine to thymidine to dTMP. Mutant  
294 DHFR strains which are unable to efficiently convert dUMP to dTMP through the *de novo* pathway  
295 due to reduced folate activity, rely substantially on the salvage pathway for their dTMP supply, as  
296 has been shown for catalytically inactive mutants of DHFR<sup>14</sup>. Hence, we next asked the question:  
297 what happens to the Tmk activity curve *in vivo* if dTMP is produced (largely) through the salvage  
298 pathway instead of being directly supplied from an external source? To that end, we supplemented  
299 the growth medium with intermediates from the salvage pathway, namely thymine and thymidine.  
300 While supplementation of thymidine increased intracellular dTMP levels for WT as well as mutants  
301 (Figure S8A), the dTDP vs dTMP levels followed the Hill like curve (Figure 7D, inset figure shows  
302 data for the I91L+W133V mutant in the absence of supplementation and in the presence of added  
303 thymidine and dTMP). This shows that direct supplementation of the substrate (dTMP) of Tmk  
304 results in very different enzyme kinetics compared to when a precursor of dTMP is supplied  
305 externally.

306 Quite surprisingly and contrary to WT, *mutant* strains did not use external thymine base  
307 towards increasing intracellular dTMP (Figure S8A), though it was uptaken by the cells (Figure S8B).  
308 We ruled out inhibition of DeoA enzyme (which interconverts thymine and thymidine) in mutants,  
309 as thymidine supplementation increases thymine levels significantly (Figure S8C). However,  
310 I91L+W133V mutant had considerably lower level of deoxy-D-ribose-1-phosphate (dR-1P) (Figure  
311 S8D) which is used as a substrate by the enzyme DeoA to synthesize thymidine from thymine. This  
312 strain also accumulated large excess of deoxy-D-ribose-5-phosphate (dR-5P) (Figure S8D),  
313 indicating that isomerization of the sugar dR-1P to dR-5P through DeoB enzyme might be one of the  
314 reasons for the lack of thymine utilization. This scenario is supported by the recent finding that cells  
315 that evolved to grow on small amounts of thymine supplement on the background of inactive DHFR  
316 mutationally deactivated DeoB thus blocking the channeling of dR-5P towards glycolysis and  
317 providing sufficient amount of dR-1P towards thymidine synthesis in the salvage pathway<sup>14</sup>.

318

319

## 320 Discussion

321 Metabolic networks of cells are inherently intertwined, with substrates and products of one  
322 pathway being utilized by another pathway. As a result, perturbations produced in one pathway can  
323 easily percolate into others, usually magnifying effects. The folate pathway or the 1-carbon  
324 metabolism pathway is a classic example of this, as reduced folates act as 1-carbon donors during  
325 biosynthesis of purines, pyrimidines and amino acids. Kwon et al <sup>27</sup> showed that for inhibition of  
326 DHFR activity using trimethoprim, accumulation of substrate dihydrofolate (DHF), in turn, results  
327 in inhibition of another downstream enzyme critical to folate metabolism: folypoly-gamma-  
328 glutamate synthetase (FP-gamma-GS), in a domino like effect (falling DHFR activity triggers a fall  
329 in the other enzyme's activity too). In this work, we show that in *E. coli* strains that harbor  
330 destabilizing mutations in *folA* gene, reduced DHFR activity strongly affects, among other factors,  
331 the pyrimidine biosynthesis pathway by reducing production of dTMP from dUMP via thymidylate  
332 synthase (ThyA) that uses a derivative of THF as one carbon source. Much like a domino effect, such  
333 drop in dTMP levels due to mutations in DHFR results in a precipitous drop in dTDP/dTTP, mainly  
334 due to the strong cooperative *in vivo* activity of another downstream essential enzyme Thymidylate  
335 Kinase (Tmk) in the pyrimidine biosynthesis pathway. Drop in dTTP level eventually leads to an  
336 imbalance in the levels of deoxynucleotides, causing errors in DNA replication, SOS response and  
337 filamentation.

338 An important finding from the current study is that enzymes can exhibit a different kinetics  
339 *in vivo* depending on the source of the substrate. In case of Tmk, the enzyme showed a conventional  
340 Michaelis-Menten type *in vivo* activity when dTMP was externally supplied through the growth  
341 medium. However, when an equivalent concentration of dTMP was produced by the cell itself using  
342 its own cascade of enzymes in the pathway, it showed a dramatically different cooperative (Hill-like)  
343 activity. There are two important questions that arise out of this observation: first, why is the intrinsic  
344 *in vivo* activity of Tmk Hill-like? Second, what causes this shift from Hill-like to Michaelis-Menten  
345 (MM)? One of the most straightforward reasons for Hill-like enzyme activity is allosteric substrate  
346 binding. However, purified Tmk *in vitro* shows perfect MM kinetics, ruling out any intrinsic allostery  
347 of the enzyme. We also found that even in the presence of high concentrations of dUMP and dCTP  
348 (the known inhibitors of Tmk), the activity of Tmk conforms to MM kinetics ruling out these  
349 metabolites as allosteric regulators (Figure S7D). The other possible mechanism of Hill-like kinetics  
350 is 'limited diffusion' of one or more of the interacting components of a reaction <sup>28,29</sup>. Conventional

351 MM enzyme kinetics relies on the assumption of free diffusion, and hence laws of mass action are  
352 obeyed. However, in case of limited diffusion, conditions of spatial uniformity are no longer  
353 maintained; hence, law of mass action is not applicable. Theoretical work as well as simulations <sup>28-</sup>  
354 <sup>33</sup> have shown that such diffusion limited reactions often exhibit kinetics with Hill-like coefficients  
355 that are significantly higher than 1, and often fractional (so called fractal kinetics), similar to Hill  
356 coefficients obtained with our data (Figure 7C, Hill coefficient=2.5). It has also been postulated that  
357 biological reactions, especially those that happen in dimensionally restricted environments like 1D  
358 channels or 2D membranes exhibit fractal like kinetics <sup>30,34</sup>. In our case, it seems more reasonable  
359 that it is the substrate dTMP that has limited diffusion rather than the enzyme Tmk itself, since  
360 addition of external dTMP alleviates the Hill-like effect (in Supplementary Text, we show a  
361 derivation of Hill-like enzyme kinetics assuming that only the substrate is diffusion limited, using a  
362 power law formalism as developed by Savageau <sup>29</sup>). But why should dTMP be diffusion limited?  
363 Substantial work in the recent past has shown that metabolic enzymes of a pathway, including those  
364 involved in purine biosynthesis <sup>35,36</sup> as well as in 1-carbon metabolism <sup>15</sup> form a metabolon, a  
365 supramolecular complex comprised of transiently interacting enzymes, that allows efficient  
366 channeling of metabolites. Though channels help in easy exchange of metabolites between  
367 consecutive enzymes and prevent their unwanted degradation or toxicity in the cytosol, they have  
368 reduced dimensionality compared to the cytosol, thereby making motion less 'random' and hence  
369 limiting diffusion of the substrate/products. In our case, it is possible that enzymes of the pyrimidine  
370 biosynthesis pathway as well as the salvage pathway form a metabolon, that limits diffusion of  
371 dTMP. External dTMP on the other hand, is free to diffuse in the cytoplasm, and hence results in  
372 traditional MM kinetics to emerge with a Hill coefficient of 1.

373         Though we do not have direct evidence of Tmk being involved in a metabolon, our study  
374 does show some circumstantial evidence. Our previous work on DHFR showed that toxicity and  
375 filamentation upon over-expression might be a hallmark of metabolon proteins <sup>15</sup>, through  
376 sequestration of neighboring/sequential proteins in the pathway. On a similar note, we found that  
377 overexpression of Tmk in WT *E. coli* cells led to filamentation (Figure S9), strongly suggesting that  
378 Tmk might be part of a metabolon. It is worth mentioning at this point that Tmk overexpression in  
379 mutant DHFR cells does not rescue filamentation (Figure S9). This is consistent with the metabolon  
380 hypothesis, since dTMP produced by the cell would still be confined to the metabolon, and hence  
381 overexpressed Tmk cannot overcome the problem of diffusion limitation of dTMP.

382 For decades, enzyme activity has been studied *in vitro* with purified enzyme in dilute solution  
383 with excess substrate. Though *in vitro* measured parameters have been largely successful to interpret  
384 cellular data <sup>2,4</sup>, in other cases they have only provided limited information <sup>37</sup>. Substantial efforts in  
385 the recent past have therefore been directed towards replicating *in vivo* like conditions with purified  
386 enzymes <sup>38-40</sup>. These include macromolecular crowding, pH conditions and buffer capacity <sup>41</sup>. In this  
387 work, we show how the *in vivo* activity curves of an enzyme can be markedly different (in case of  
388 Tmk strongly Hill-like) from its perfect MM like kinetics *in vitro*. Based on available literature and  
389 some of our preliminary experiments, metabolon formation and subsequent diffusion limitation of  
390 substrate dTMP through the *de novo* and salvage pyrimidine biosynthesis pathway seems like the  
391 most probable mechanism. Future work will prove or disprove this hypothesis. However, regardless  
392 of the mechanism, this work provides convincing evidence that the cellular environment can  
393 modulate enzyme activity in a very fundamental way, which explains a key bacterial phenotype in  
394 our case.

395 In this study, we used metabolomics as the key tool to link molecular effects of mutations to  
396 phenotype and illustrate precise biochemical and biophysical mechanisms through which altered  
397 metabolite levels modulate bacterial phenotypes, in this case, filamentation. Detailed metabolomics  
398 analysis allowed us to pinpoint the pathway and specific enzyme responsible for the phenotype and,  
399 surprisingly, it turned out to be far downstream from the mutant locus (*folA*). Furthermore, the  
400 culprit, Tmk, does not use products of the folate pathway as a cofactor. Nevertheless, it appears that  
401 perturbation of the folate pathway caused by mutations in DHFR propagated downstream in a  
402 domino-like manner to create a bottleneck in a specific metabolite dTDP triggering cellular SOS  
403 response and pronounced phenotypic effects manifested in altered cell morphology. Altogether our  
404 results show how metabolomics can be used as a stepping-stone from biophysical analysis of  
405 variation of molecular properties of enzymes to phenotypic manifestation of mutations and close the  
406 gap in the multi-scale genotype-phenotype relationship.

## 407 **Acknowledgements**

408 This work was supported by NIH grant GM068670 to E.I.S.

409

## 410 **Author contributions**

411 Conceptualization, S.Bh., S.Be., and E.I.S.; Methodology, S.Bh., S.Be., B.V.A., J.W., and E.I.S.;

412 Formal Analysis, S.Bh., S.Be., B.V.A., and E.I.S.; Investigation, S.Bh., S.Be., B.V.A., J.W.; Writing-

413 original draft, S.Bh., and E.I.S.; writing-review & editing, S.Bh., S.Be., B.V.A., and E.I.S.;

414 Supervision, E.I.S.; Funding acquisition, E.I.S.

415

## 416 **References**

- 417 1 Adkar, B. V., Bhattacharyya, S., Gilson, A. I., Zhang, W. & Shakhnovich, E. I. Substrate  
418 inhibition imposes fitness penalty at high protein stability. *Proc Natl Acad Sci U S A* **116**,  
419 11265-11274, doi:10.1073/pnas.1821447116 (2019).
- 420 2 Adkar, B. V. *et al.* Optimization of lag phase shapes the evolution of a bacterial enzyme.  
421 *Nat Ecol Evol* **1**, 149, doi:10.1038/s41559-017-0149 (2017).
- 422 3 Bershtein, S. *et al.* Protein Homeostasis Imposes a Barrier on Functional Integration of  
423 Horizontally Transferred Genes in Bacteria. *PLoS Genet* **11**, e1005612,  
424 doi:10.1371/journal.pgen.1005612 (2015).
- 425 4 Rodrigues, J. V. *et al.* Biophysical principles predict fitness landscapes of drug  
426 resistance. *Proc Natl Acad Sci U S A* **113**, E1470-1478, doi:10.1073/pnas.1601441113  
427 (2016).
- 428 5 Bershtein, S., Serohijos, A. W. & Shakhnovich, E. I. Bridging the physical scales in  
429 evolutionary biology: from protein sequence space to fitness of organisms and  
430 populations. *Curr Opin Struct Biol* **42**, 31-40, doi:10.1016/j.sbi.2016.10.013 (2017).
- 431 6 Bershtein, S., Choi, J. M., Bhattacharyya, S., Budnik, B. & Shakhnovich, E. Systems-  
432 level response to point mutations in a core metabolic enzyme modulates genotype-  
433 phenotype relationship. *Cell Rep* **11**, 645-656, doi:10.1016/j.celrep.2015.03.051 (2015).
- 434 7 Bennett, B. D. *et al.* Absolute metabolite concentrations and implied enzyme active site  
435 occupancy in *Escherichia coli*. *Nat Chem Biol* **5**, 593-599, doi:10.1038/nchembio.186  
436 (2009).
- 437 8 Fiehn, O. Metabolomics--the link between genotypes and phenotypes. *Plant Mol Biol* **48**,  
438 155-171 (2002).
- 439 9 Handakumbura, P. P. *et al.* Metabotyping as a Stopover in Genome-to-Phenome  
440 Mapping. *Sci Rep* **9**, 1858, doi:10.1038/s41598-019-38483-0 (2019).
- 441 10 Harrison, B. R. *et al.* The metabolome as a link in the genotype-phenotype map for  
442 peroxide resistance in the fruit fly, *Drosophila melanogaster*. *BMC Genomics* **21**, 341,  
443 doi:10.1186/s12864-020-6739-1 (2020).
- 444 11 Johnson, C. H., Ivanisevic, J. & Siuzdak, G. Metabolomics: beyond biomarkers and  
445 towards mechanisms. *Nat Rev Mol Cell Biol* **17**, 451-459, doi:10.1038/nrm.2016.25  
446 (2016).
- 447 12 Patti, G. J., Yanes, O. & Siuzdak, G. Innovation: Metabolomics: the apogee of the omics  
448 trilogy. *Nat Rev Mol Cell Biol* **13**, 263-269, doi:10.1038/nrm3314 (2012).
- 449 13 Zampieri, M. & Sauer, U. Metabolomics-driven understanding of genotype-phenotype  
450 relations in model organisms. *Current Opinion in Systems Biology* **6**, 28-36,  
451 doi:<https://doi.org/10.1016/j.coisb.2017.08.007> (2017).
- 452 14 Rodrigues, J. V. & Shakhnovich, E. I. Adaptation to mutational inactivation of an  
453 essential gene converges to an accessible suboptimal fitness peak. *Elife* **8**,  
454 doi:10.7554/eLife.50509 (2019).
- 455 15 Bhattacharyya, S. *et al.* Transient protein-protein interactions perturb *E. coli* metabolome  
456 and cause gene dosage toxicity. *Elife* **5**, doi:10.7554/eLife.20309 (2016).

- 457 16 Bhattacharyya, S. *et al.* Accessibility of the Shine-Dalgarno Sequence Dictates N-  
458 Terminal Codon Bias in *E. coli*. *Mol Cell* **70**, 894-905 e895,  
459 doi:10.1016/j.molcel.2018.05.008 (2018).
- 460 17 Fuhrer, T., Zampieri, M., Sevin, D. C., Sauer, U. & Zamboni, N. Genomewide landscape  
461 of gene-metabolome associations in *Escherichia coli*. *Mol Syst Biol* **13**, 907,  
462 doi:10.15252/msb.20167150 (2017).
- 463 18 Mulleder, M. *et al.* Functional Metabolomics Describes the Yeast Biosynthetic  
464 Regulome. *Cell* **167**, 553-565 e512, doi:10.1016/j.cell.2016.09.007 (2016).
- 465 19 Bershtein, S., Mu, W., Serohijos, A. W., Zhou, J. & Shakhnovich, E. I. Protein Quality  
466 Control Acts on Folding Intermediates to Shape the Effects of Mutations on Organismal  
467 Fitness. *Mol Cell* **49**, 133-144, doi:10.1016/j.molcel.2012.11.004 (2013).
- 468 20 Bershtein, S., Mu, W. & Shakhnovich, E. I. Soluble oligomerization provides a beneficial  
469 fitness effect on destabilizing mutations. *Proc Natl Acad Sci U S A* **109**, 4857-4862,  
470 doi:1118157109 [pii] 10.1073/pnas.1118157109 (2012).
- 471 21 Maguin, E., Brody, H., Hill, C. W. & D'Ari, R. SOS-associated division inhibition gene  
472 *sfhC* is part of excisable element *e14* in *Escherichia coli*. *J Bacteriol* **168**, 464-466,  
473 doi:10.1128/jb.168.1.464-466.1986 (1986).
- 474 22 Ahmad, S., Kirk, S. & Eisenstark, A. Thymine metabolism and thymineless death in  
475 prokaryotes and eukaryotes. *Annual review of microbiology* **52**, 591-625 (1998).
- 476 23 Sangurdekar, D. P. *et al.* Thymineless death is associated with loss of essential genetic  
477 information from the replication origin. *Mol Microbiol* **75**, 1455-1467,  
478 doi:10.1111/j.1365-2958.2010.07072.x (2010).
- 479 24 Kwon, Y. K., Higgins, M. B. & Rabinowitz, J. D. Antifolate-induced depletion of  
480 intracellular glycine and purines inhibits thymineless death in *E. coli*. *ACS Chem Biol* **5**,  
481 787-795, doi:10.1021/cb100096f (2010).
- 482 25 Nelson, D. J. & Carter, C. E. Purification and characterization of Thymidine 5-  
483 monophosphate kinase from *Escherichia coli* B. *J Biol Chem* **244**, 5254-5262 (1969).
- 484 26 Møllgaard, H. & Neuhaard, J. *Biosynthesis of deoxythymidine triphosphate*. 149-199  
485 (Academic Press, New York, NY, 1983).
- 486 27 Kwon, Y. K. *et al.* A domino effect in antifolate drug action in *Escherichia coli*. *Nat*  
487 *Chem Biol* **4**, 602-608, doi:10.1038/nchembio.108 (2008).
- 488 28 Savageau, M. A. Development of fractal kinetic theory for enzyme-catalysed reactions  
489 and implications for the design of biochemical pathways. *Biosystems* **47**, 9-36,  
490 doi:10.1016/s0303-2647(98)00020-3 (1998).
- 491 29 Savageau, M. A. Michaelis-Menten mechanism reconsidered: implications of fractal  
492 kinetics. *J Theor Biol* **176**, 115-124, doi:10.1006/jtbi.1995.0181 (1995).
- 493 30 Liebovitch, L. S., Fischbarg, J., Koniarek, J. P., Todorova, I. & Wang, M. Fractal model  
494 of ion-channel kinetics. *Biochim Biophys Acta* **896**, 173-180, doi:10.1016/0005-  
495 2736(87)90177-5 (1987).
- 496 31 Li, H. Q., Chen, S. H. & Zhao, H. M. Fractal mechanisms for the allosteric effects of  
497 proteins and enzymes. *Biophys J* **58**, 1313-1320, doi:10.1016/S0006-3495(90)82472-3  
498 (1990).
- 499 32 Kopelman, R. Fractal reaction kinetics. *Science* **241**, 1620-1626,  
500 doi:10.1126/science.241.4873.1620 (1988).
- 501 33 Frank, S. A. Input-output relations in biological systems: measurement, information and  
502 the Hill equation. *Biol Direct* **8**, 31, doi:10.1186/1745-6150-8-31 (2013).



- 503 34 Schnell, S. & Turner, T. E. Reaction kinetics in intracellular environments with  
504 macromolecular crowding: simulations and rate laws. *Prog Biophys Mol Biol* **85**, 235-  
505 260, doi:10.1016/j.pbiomolbio.2004.01.012 (2004).
- 506 35 French, J. B. *et al.* Spatial colocalization and functional link of purinosomes with  
507 mitochondria. *Science* **351**, 733-737, doi:10.1126/science.aac6054 (2016).
- 508 36 An, S., Kumar, R., Sheets, E. D. & Benkovic, S. J. Reversible compartmentalization of de  
509 novo purine biosynthetic complexes in living cells. *Science* **320**, 103-106,  
510 doi:10.1126/science.1152241 (2008).
- 511 37 van Eunen, K., Kiewiet, J. A., Westerhoff, H. V. & Bakker, B. M. Testing biochemistry  
512 revisited: how in vivo metabolism can be understood from in vitro enzyme kinetics. *PLoS*  
513 *Comput Biol* **8**, e1002483, doi:10.1371/journal.pcbi.1002483 (2012).
- 514 38 Zotter, A., Bauerle, F., Dey, D., Kiss, V. & Schreiber, G. Quantifying enzyme activity in  
515 living cells. *J Biol Chem* **292**, 15838-15848, doi:10.1074/jbc.M117.792119 (2017).
- 516 39 Davidi, D. *et al.* Global characterization of in vivo enzyme catalytic rates and their  
517 correspondence to in vitro kcat measurements. *Proc Natl Acad Sci U S A* **113**, 3401-3406,  
518 doi:10.1073/pnas.1514240113 (2016).
- 519 40 Garcia-Contreras, R., Vos, P., Westerhoff, H. V. & Booger, F. C. Why in vivo may not  
520 equal in vitro - new effectors revealed by measurement of enzymatic activities under the  
521 same in vivo-like assay conditions. *FEBS J* **279**, 4145-4159, doi:10.1111/febs.12007  
522 (2012).
- 523 41 van Eunen, K. B., B. M. The importance and challenges of in vivo-like enzyme kinetics.  
524 *Perspectives in Science* **1**, 126-130, doi:10.1016/j.pisc.2014.02.011 (2014).
- 525 42 Torre-Bueno, J. R. Temperature regulation and heat dissipation during flight in birds. *J*  
526 *Exp Biol* **65**, 471-482 (1976).
- 527 43 Guenther, S. *et al.* Antimicrobial resistance profiles of Escherichia coli from common  
528 European wild bird species. *Vet Microbiol* **144**, 219-225,  
529 doi:10.1016/j.vetmic.2009.12.016 (2010).
- 530 44 Bhattacharyya, S., Bershtein, S. & Shakhnovich, E. I. Gene Dosage Experiments in  
531 Enterobacteriaceae Using Arabinose-regulated Promoters. *Bio-Protocol* **7**, e2396,  
532 doi:10.21769/BioProtoc.2396 (2017).
- 533 45 Sliusarenko, O., Heinritz, J., Emonet, T. & Jacobs-Wagner, C. High-throughput, subpixel  
534 precision analysis of bacterial morphogenesis and intracellular spatio-temporal dynamics.  
535 *Mol Microbiol* **80**, 612-627, doi:10.1111/j.1365-2958.2011.07579.x (2011).
- 536

538 **Figures and Legends**

Figure 1

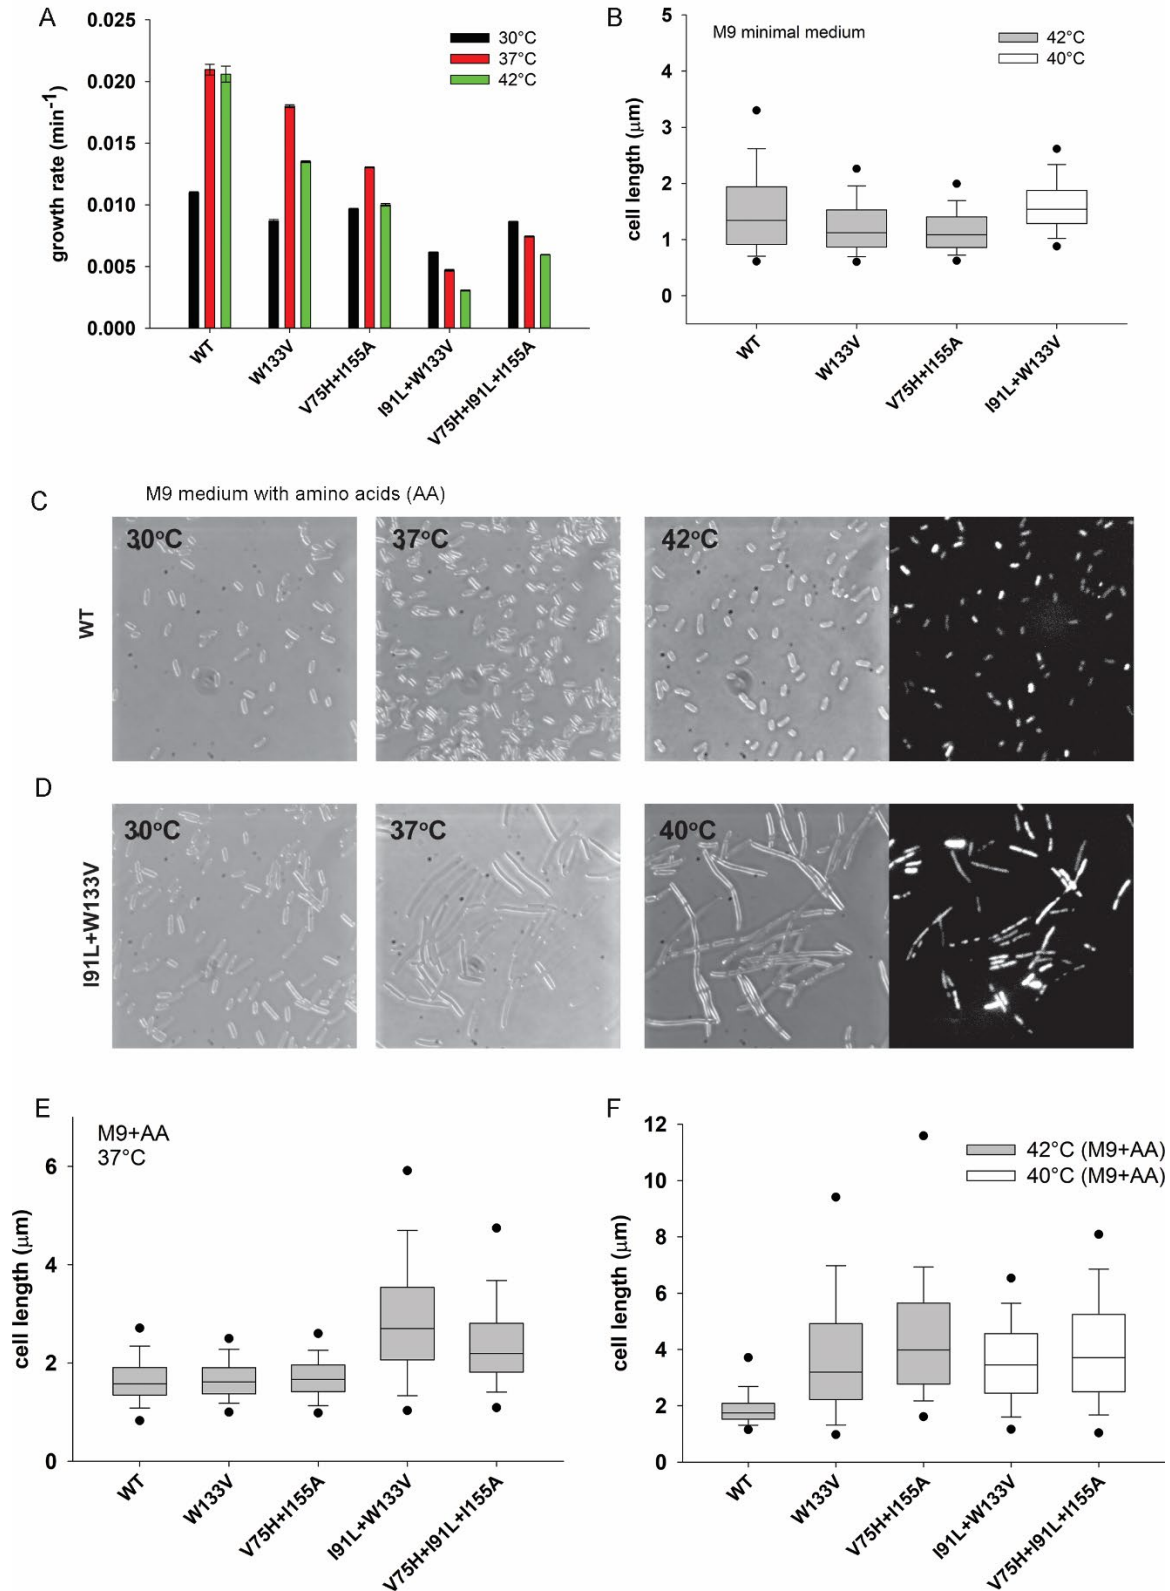

540 **Figure 1: Destabilizing mutations in DHFR induce filamentous phenotype.** (A) Growth rates  
541 of mutant DHFR strains at 30°C, 37°C and 42°C. While most mutants grow well at 30°C, they  
542 grow very poorly at high temperatures. Error bars represent SEM of three biological replicates.  
543 (B) Distribution of cell lengths of WT and mutants W133V and V75H+I155A at 42°C (gray box)  
544 and I91L+W133V at 40°C (represented as white box) after being grown in M9 minimal medium  
545 for 4 hours. Median cell length of W133V and V75H+I155A is significantly smaller than WT  
546 (Mann-Whitney test, p-value <0.001). Live cells DIC images and DAPI nucleoids staining of (C)  
547 WT DHFR and (D) I91L+W133V DHFR strains after being grown at 30°C, 37°C, or 42°C  
548 (I91L+W133V was grown at 40°C) in M9 medium supplemented with amino acids for 4 hours  
549 (see *Methods*). Cell lengths were measured from the obtained DIC images (see *Methods*) and their  
550 distribution at 37°C and 40°C/42°C is shown in (E) and (F) as box-plots (see *Methods*). Images of  
551 other mutant DHFR strains W133V, V75H+I155A and V75H+I91L+I155A are presented in  
552 related Figure S1.

553

554 **Figure 2**

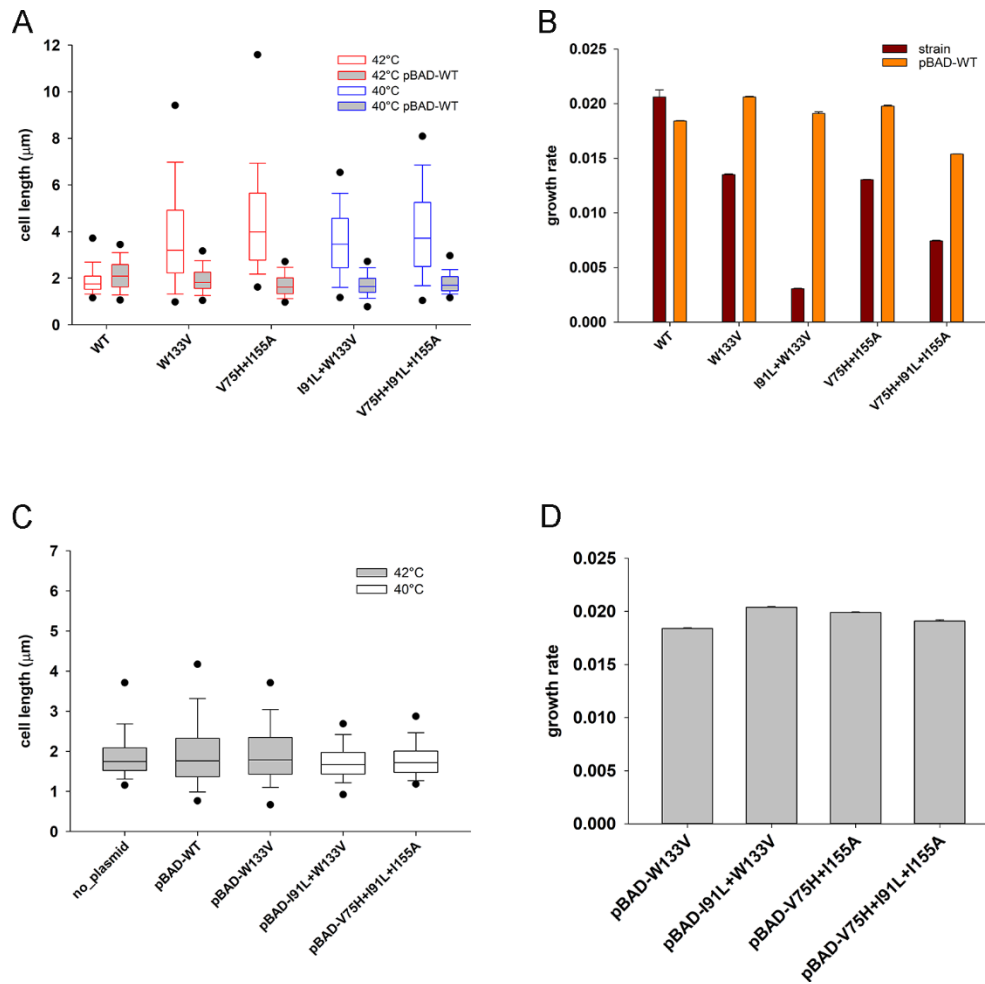

555

556 **Figure 2: Filamentation in mutant DHFR strains is due to loss of DHFR activity.** WT and  
557 mutant DHFR strains were transformed with pBAD plasmid that expressed WT DHFR under  
558 control of arabinose promoter. Transformed cells were grown at 42°C (for WT, W133V and  
559 V75H+I155A strains) or at 40°C (for I91L+W133V and V75H+I91L+I155A) in M9 medium  
560 supplemented with amino acids. Functional complementation of WT DHFR rescues both (A)  
561 filamentation and (B) growth defects of mutant strains. Expression of mutant proteins from pBAD  
562 plasmid on the WT background does not result in (C) filamentation or (D) growth defects. See  
563 related Figure S2.

564

565 **Figure 3**

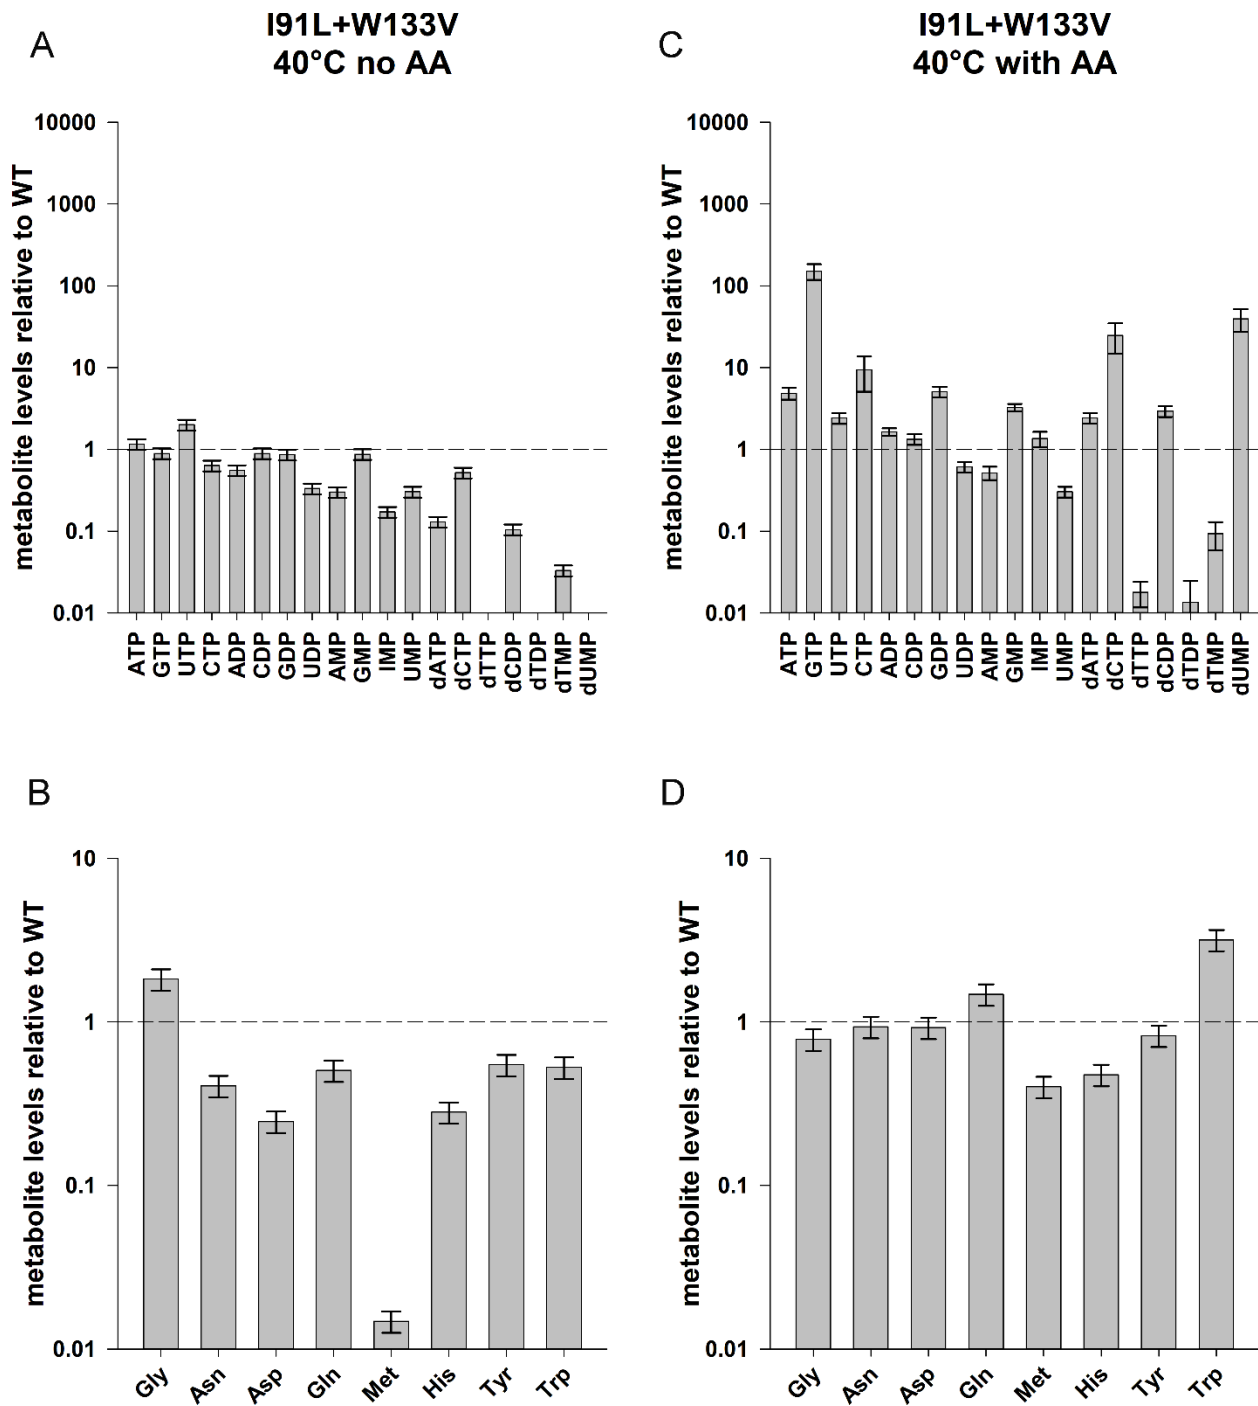

566

567 **Figure 3: Metabolomics of mutant DHFR strains in minimal media without or with added**  
 568 **amino acids.** (A) and (B) shows abundance of selected nucleotides and amino acids for mutant  
 569 I91L+W133V after 4 hours of growth at 40°C in M9 minimal medium (no filamentation), while  
 570 (C) and (D) represents nucleotide and amino acid abundances after 4 hours of growth in amino

571 acid supplemented M9 medium at 40°C (condition of filamentation). Concentration of all  
572 metabolites were normalized to WT levels at 4 hours when grown under similar conditions. In  
573 minimal medium (B), Methionine levels are extremely low, which recover in panel (D). Levels of  
574 purines (IMP, AMP) as well as pyrimidines (dTMP) are rescued with amino acid supplementation,  
575 however dTDP and dTTP levels remain extremely low. Error bars represent SEM of at least three  
576 biological replicates (see *Methods*). See related Figures S5A-B and Table S1.

577

578 **Figure 4**

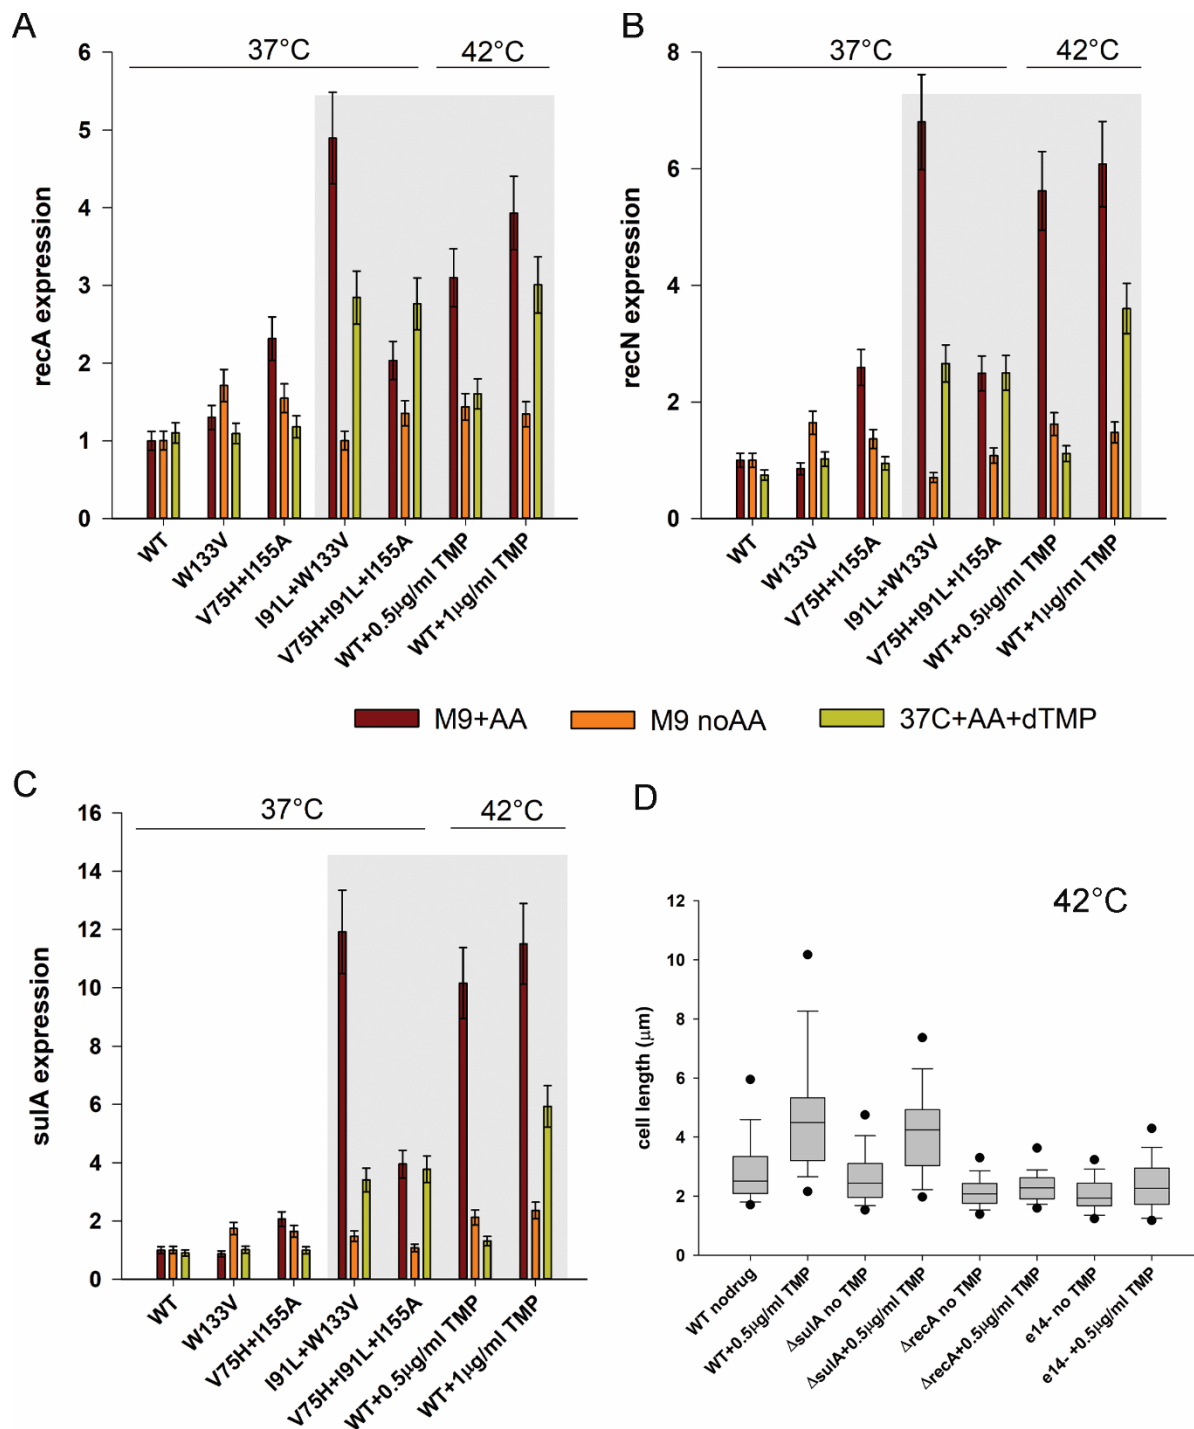

579

580 **Figure 4: Filamentation in mutant DHFR strains is associated with strong SOS response.**  
 581 Expression of (A) *recA* (B) *recN* and (C) *sulA* genes measured by quantitative PCR when WT and  
 582 mutant strains are grown in M9 medium with or without supplementation of amino acids or dTMP.

583 WT and mutant strains were grown for 4 hours of growth in the indicated medium at 37°C, while  
584 WT treated with different concentrations of TMP were grown for 4 hours at 42°C. Brown bars  
585 (M9+AA) in the gray shaded area correspond to filamentation conditions and these are associated  
586 with pronounced upregulation of all three SOS genes. On the other hand, conditions with loss of  
587 filamentation (with dTMP or no supplementation) show much less expression. Error bars represent  
588 SD of 2-3 biological replicates (see *Methods*). (D) Treatment of WT *E. coli* cells with sub-MIC  
589 concentration of TMP (0.5µg/ml) leads to filamentation at 42°C when grown in amino acid  
590 supplemented medium. However, a *recA* knock-out strain under similar condition shows no  
591 elongation, indicating the role of SOS pathway in filamentation. A *sulA* knock-out continues to  
592 elongate, indicating the role of *sulA*-independent pathways. An *E. coli* strain deleted for the e14  
593 prophage region however showed no filamentation upon TMP treatment, indicating that *sfiC* gene  
594 in the e14 region might be one such *sulA* independent player.

595



596 **Figure 5**

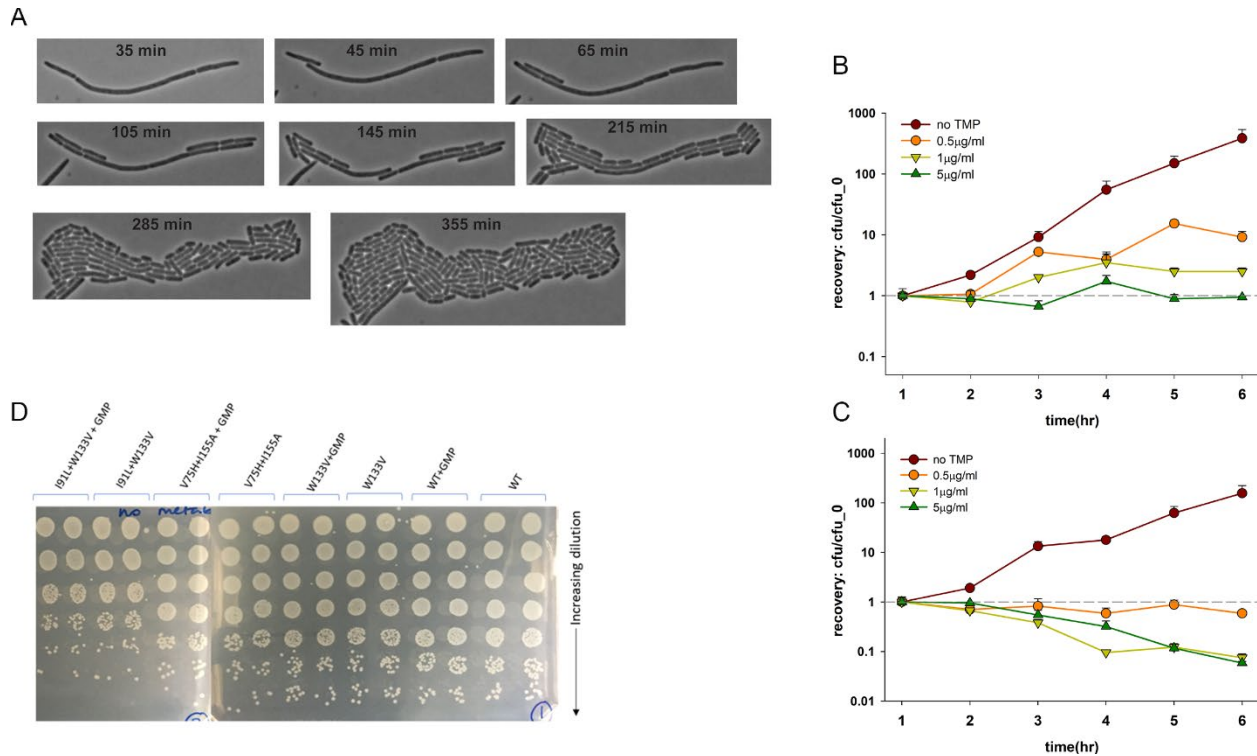

597

598 **Figure 5: Filamentation in mutant DHFR strains is completely reversible.** (A) Mutant W133V  
 599 was grown in amino acid supplemented M9 medium (M9+AA) for 4 hours at 42°C, and  
 600 subsequently placed on M9 agar pads and their growth was monitored at room temperature. Shown  
 601 are phase contrast images taken from different time points throughout the time-lapse experiment.  
 602 Unlike cells experiencing TLD, an irreversible phenomenon, W133V DHFR cells recover and  
 603 resume growth at low temperature. (B and C) WT cells were treated with different concentrations  
 604 of TMP at 42°C for varying amounts of time in amino acid supplemented M9 medium (panel B)  
 605 or in M9 media supplemented with both amino acids and GMP (panel C), following which they  
 606 were spotted on M9+AA plates and allowed to grow at 30°C. Colonies were counted next day. In  
 607 the presence of only amino acids, there was no loss in viability for any concentration of TMP  
 608 (panel B), despite extensive filamentation (Figure S4B). In contrast, in the presence of amino acids  
 609 and GMP, the cells showed sharp loss in viability when grown at high TMP concentrations. In  
 610 both panels, error bars represent SD of three biological replicates. (D) WT and mutants were grown  
 611 as in (A) for 6 hours at 42°C in M9+AA medium without or with GMP, and subsequently diluted  
 612 serially and spotted on M9+AA agar plates and allowed to grow at 30°C till visible colonies were  
 613 formed. No loss in viability was observed for WT or mutants.

614 **Figure 6**

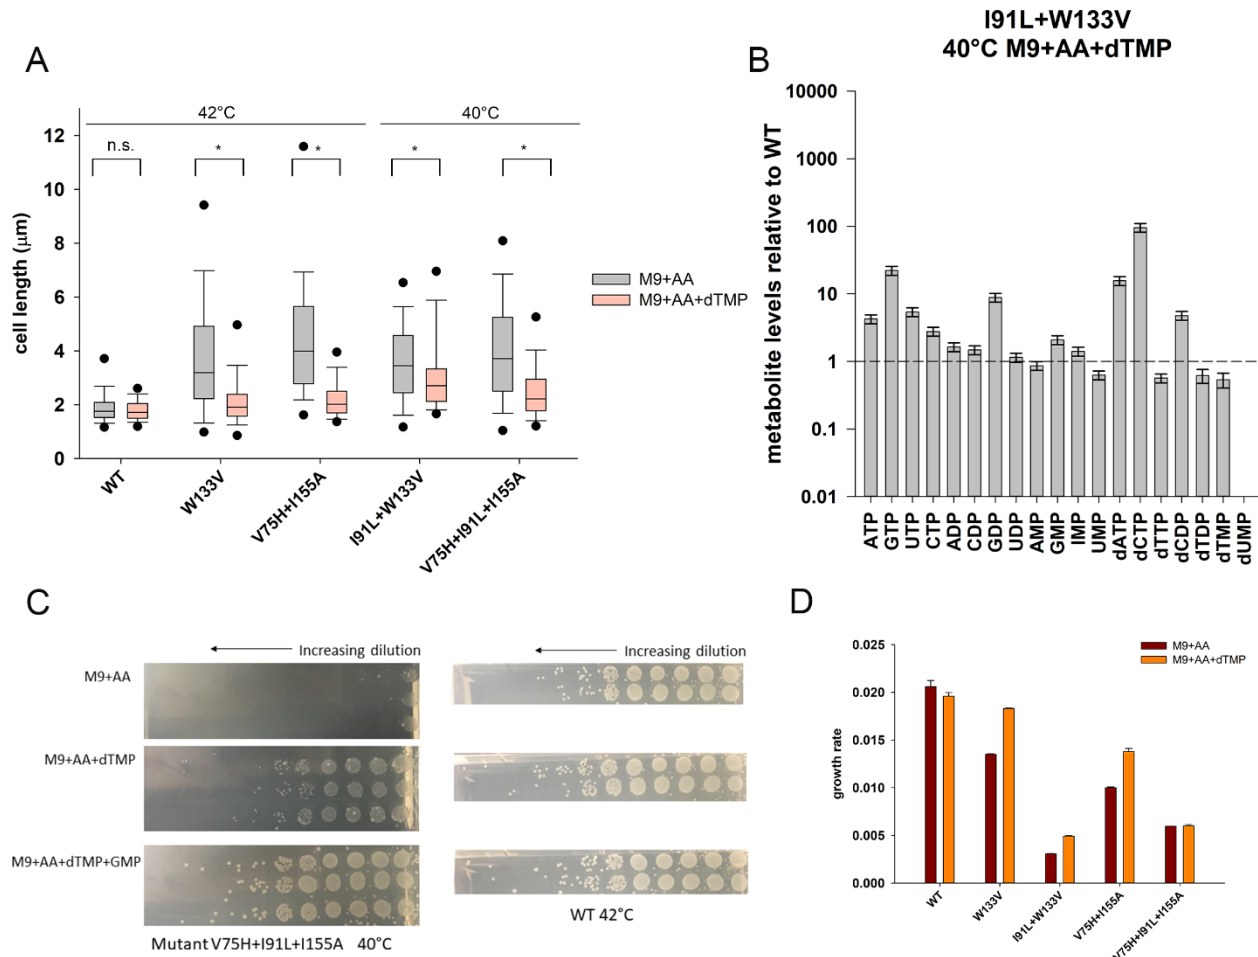

615

616 **Figure 6: Supplementation of dTMP alleviates dTDP/dTTP levels and rescues filamentation.**

617 (A) Distribution of cell length of WT and mutant strains when grown in M9 medium supplemented  
 618 with amino acids (gray) or with both amino acids and 1mM dTMP (pink). WT, W133V and  
 619 V75H+I155A strains were grown at 42°C while I91L+W133V and V75H+I91L+I155A mutants  
 620 were grown at 40°C. 1mM dTMP largely rescues filamentation of mutant strains (\* indicates the  
 621 median cell lengths were significantly different, Mann-Whitney test, p-value <0.001). (B)  
 622 Abundances of selected nucleotides in I91L+W133V mutant when grown for 4 hours at 40°C in  
 623 M9 medium supplemented with both amino acids and 1mM dTMP. Metabolite levels were  
 624 normalized to those of WT grown under similar conditions. dTDP and dTTP levels recover and  
 625 are now comparable to dTMP levels. Error bars represent SEM of 3 biological replicates. (C)  
 626 Mutant V75H+ I91L+I155A grows very poorly (in terms of colony forming units, cfu) on a  
 627 minimal media agar plate supplemented with amino acids (M9+AA) at 40°C. Supplementation of

628 additional dTMP increases the cfu by several orders at the same temperature, while  
629 supplementation with both pyrimidine (dTMP) and purine (GMP) allows it to grow as good as  
630 WT. In comparison, WT was grown at 42°C under different supplementation conditions. In all  
631 cases, cultures were 7-fold serially diluted for the next spot. The three rows (two rows for WT) in  
632 each condition represent biological replicates. (D) Comparison of growth rates of WT and mutant  
633 DHFR strains at 42°C (40°C for I91L+W133V and V75H+I91L+I155A) in minimal medium that  
634 is supplemented with amino acids and/or 1mM dTMP. Except for W133V and to a lesser extent  
635 for V75H+I155A, the effect of dTMP on growth rates is only modest. Error bars represent SEM  
636 of 3 biological replicates.

637

638 **Figure 7**

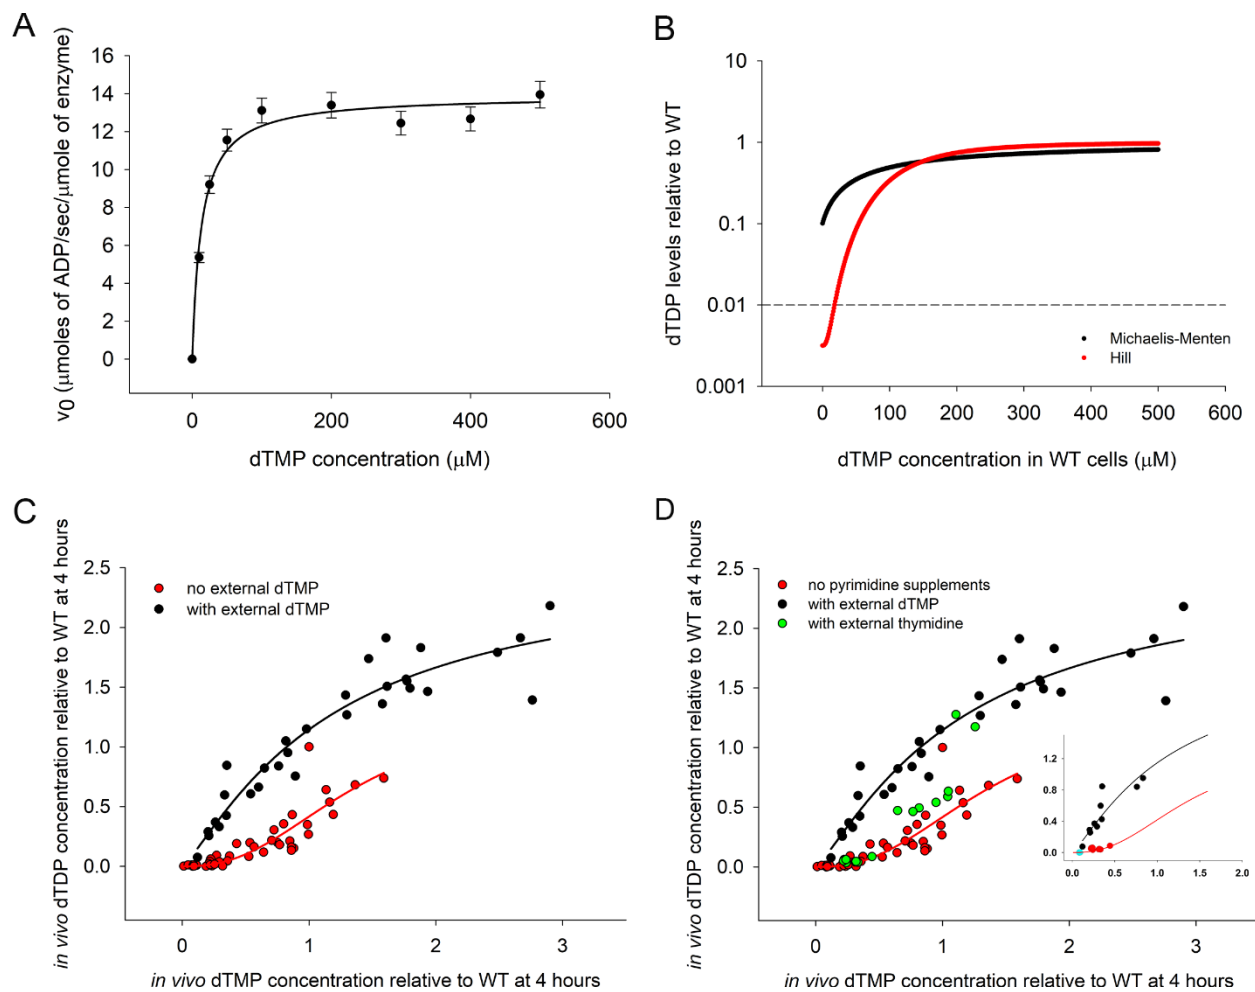

639

640 **Figure 7: *In vivo* enzyme kinetics of Tmk is highly cooperative and different from that *in***  
641 ***vitro*.** (A) *in vitro* activity of purified Thymidylate Kinase (Tmk) as a function of dTMP  
642 concentration shows Michaelis-Menten (MM) like kinetics. ATP concentration is saturating at  
643 1mM. The  $K_M$  of dTMP is  $13\mu$ M. (B) For a 10-fold drop in intracellular dTMP concentration in  
644 mutant relative to WT (as seen in I91L+W133V mutant), we calculate dTDP levels in mutant  
645 (relative to WT) as a function of various assumed intracellular concentrations of dTMP in WT  
646 (shown along x-axis), as absolute value of this is not known experimentally, assuming MM  
647 kinetics (black line) as shown in panel (A) or Hill kinetics with coefficient of 2.5 (red line) as  
648 shown in panel (C). The dotted line corresponds to the experimentally observed dTDP ratio of 0.01  
649 for I91L+W133V mutant. This ratio is realized only for the Hill-like curve. (C) Apparent *in vivo*  
650 activity kinetics of Tmk enzyme using steady state dTMP and dTDP levels obtained from

651 metabolomics. The plot includes data from WT, mutants W133V and I91L+W133V, as well as  
652 WT treated with 0.5 $\mu$ g/ml Trimethoprim, obtained at different time points during growth. Data  
653 points represent metabolite levels for all individual biological replicates without averaging. The  
654 black data points were acquired during growth in the presence of different concentrations of  
655 external dTMP (0.25, 0.5, 1, 2 and 5mM), while red points were from conditions with no external  
656 dTMP. Both black and red solid lines represent fit to Hill equation. (D) The green points were  
657 acquired during growth of WT, W133V and I91L+W133V mutants in the presence of different  
658 concentrations of thymidine, which follow the red curve. The inset plot shows the same graph with  
659 selected datapoints for I91L+W133V mutant. The cyan circle shows I91L+W133V mutant in the  
660 absence of any metabolite supplementation, while red and black points indicate metabolite levels  
661 following thymidine and dTMP supplementation respectively.

662

## 663 **Methods**

664 **Strains and media.** The mutant DHFR strains chosen for this study (W133V, I91L+W133V,  
665 V75H+I155A and V75H+I91L+I155A) were a subset of strains generated in and described in  
666 Bershtein *et al*<sup>20</sup>. Briefly, using structural and sequence analyses, positions were chosen that were  
667 buried in the protein and located at least 4Å away from the active site, so that mutations introduced  
668 at these positions would have minimal effect on enzymatic activity. The mutations were intended  
669 to destabilize the protein as was confirmed by stability measurements of the purified proteins. The  
670 single mutants were in most cases mild to moderately destabilizing, and hence certain mutations  
671 were combined to increase the range of destabilization achieved. These mutations were eventually  
672 introduced into the chromosomal copy of the *folA* at its endogenous locus keeping its regulatory  
673 region intact, and the effect of the mutations on its growth and morphology were measured at 30,  
674 37 and 42°C. The reason for choosing a wide range of temperature instead of following a single  
675 conventional temperature of 37°C was that *E. coli* is a gut bacterium and inhabit hosts whose core  
676 body temperatures span a large range (37-38°C for mammals, 40-45°C for birds<sup>42,43</sup>). Moreover,  
677 since the chosen mutants were temperature sensitive, the phenotypic manifestation of the  
678 mutations was the largest at the extremes of temperatures, in case of *E. coli* at 42°C.

679 Wherever mentioned, M9 minimal medium *without amino acids* was only supplemented with  
680 0.2% glucose and 1mM MgSO<sub>4</sub> while M9 media *with amino acids* was supplemented with 0.2%  
681 glucose, 1mM MgSO<sub>4</sub>, 0.1% casamino acids, and 0.5 µg/ml thiamine. Casamino acids is a  
682 commercially available mixture of all amino acids except tryptophan, and cysteine is present in a  
683 very small amount. Wherever mentioned, 1mM GMP was used as a source of purine, while dTMP  
684 (thymidine monophosphate) was used at a concentration of 0.25-1mM. Thymidine was used at  
685 two different concentrations of 0.5mM and 1mM.

686 **Growth conditions.** All strains were grown overnight from a single colony at 30°C, and  
687 subsequently the culture was diluted to a final OD<sub>600</sub> of 0.01 in the specified medium and allowed  
688 to grow for 16-18 hours in Bioscreen C (Growth Curves, USA) at 30°C, 37°C or 42°C. Growth  
689 curves were fit to a 4-parameter Gompertz equation as described in<sup>44</sup> to derive growth parameters.  
690 Error bars were calculated as SEM of three biological replicates.

691 **Light microscopy.** Cells were grown overnight at 30°C from a single colony in the specified  
692 medium, diluted 1/100, and grown at various temperatures for 4 hours. For DIC images in Figures

693 1C, 1D, Figure S1, cells were pelleted, washed with PBS, and concentrated. DAPI staining  
694 (Molecular probes) was performed for 10 min at RT according to manufacturer instructions. 1  $\mu$ l  
695 of a concentrated culture was then mounted on a slide and slightly pressed by a cover slip. DIC  
696 and DAPI images were obtained at room temperature by Nikon Ti Eclipse Microscope equipped  
697 with iXon EMCCD camera (Andor Technologies). For live phase contrast images and time-lapse  
698 experiments (Figure S8), cells were mounted on supplemented M9 + 1.5% low melting agarose  
699 (Calbiochem) pads. Pads were then flipped on #1.5 glass dish (Willco Wells), and the images were  
700 acquired at room temperature with Zeiss Cell Observer microscope. For DIC images in Figure S9,  
701 cells were placed on agar pads and images were acquired with Zeiss Cell Discoverer microscope.

702 **Analysis of cell lengths.** MicrobeTracker Suite [<http://microbetracker.org/>]<sup>45</sup> was used to obtain  
703 distributions of cell length for phase contrast images and Zeiss Intellesis Module was used to  
704 analyze DIC images. On average, 500 cells were analyzed for each presented distribution. The cell  
705 lengths are represented in all figures as box-plots, where the boundaries of the box represent the  
706 25<sup>th</sup> and 75<sup>th</sup> percentile, the line inside the box represents the median of the distribution, whiskers  
707 represent the 10<sup>th</sup> and 90<sup>th</sup> percentile, while the dots represent the 5<sup>th</sup> and 95<sup>th</sup> percentile.

708 **Statistical analysis.** In our experiments, cell lengths of *E. coli* were not normally distributed.  
709 Hence non-parametric Mann-Whitney test was used to determine if the median cell lengths of two  
710 samples were significantly different. In Figure 7C, fits to two different models, Michaelis-Menten  
711 and 3-parameter Hill were compared using extra sum-of-squares F-test using GraphPad Prism  
712 software v9.0.0.

713 **Metabolomics.** Cells were grown overnight at 30°C from a single colony in the specified medium,  
714 diluted 1/100, and re-grown. WT, WT+0.5 $\mu$ g/ml TMP and W133V mutant were grown at 42°C,  
715 while mutant I91L+W133V was grown at 40°C. For time course experiment, aliquots were  
716 removed after 2, 4, 6 and 8 hours, and metabolites were extracted as described in <sup>15</sup>. Briefly, the  
717 cells were washed 2 times with chilled 1 $\times$ M9 salts, and metabolites were extracted using 300 $\mu$ l of  
718 80:20 ratio of methanol:water that had been pre-chilled on dry ice. The cell suspension was  
719 immediately frozen in liquid nitrogen followed by a brief thawing (for 30 seconds) in a water bath  
720 maintained at 25°C and centrifugation at 4°C at maximum speed for 10 minutes. The supernatant  
721 was collected and stored on dry ice. This process of extraction of metabolite was repeated two  
722 more times. The final 900 $\mu$ l extract was spun down one more time and the supernatant was stored  
723 in -80°C till used for mass spectrometry. Metabolite levels were averaged over 2-3 biological

724 replicates. In Figure 7C, data points represent metabolite levels for all biological replicates without  
725 averaging.

726 **Expression of SOS response genes by qPCR.** Cells were grown overnight at 30°C from a single  
727 colony in the specified medium, diluted 1/100, and grown at 37°C or 42°C for 4 hours. Based on  
728 OD<sub>600</sub> of the cultures, a volume equivalent to 5×10<sup>8</sup> cells were spun down (assuming  
729 1 OD<sub>600</sub>=8×10<sup>8</sup> cells) and Protect Bacteria RNA Mini Kit (Qiagen) was used to extract total RNA  
730 as described in <sup>16</sup>. Following reverse transcription <sup>16</sup>, expression of *recA*, *recN* and *sulA* genes were  
731 quantified using QuantiTect SYBR Green PCR kit (Qiagen) using the following primers:

732 *recA*\_fwd     ACAAACAGAAAGCGTTGGCG  
733 *recA*\_rev     AGCGCGATATCCAGTGAAAG  
734 *recN*\_fwd     TTGGCACAACACTGACCATCAG  
735 *recN*\_rev     GACCACCGAGACAAAGAC  
736 *sulA*\_fwd     GTACACTTCAGGCTATGCAC  
737 *sulA*\_rev     GCAACAGTAGAAGTTGCGTC

738 As it was difficult to find a reference gene that would be expressed to similar levels in WT vs  
739 mutant DHFR strains, we used total RNA to normalize the expression levels.

740 Expression levels reported are average of 3 biological replicates. Error bars in Figure 4 represent  
741 12% of the mean value.

742 **Tmk protein purification.** The *tmk* gene was cloned in pET28a plasmid between *NdeI* and *XhoI*  
743 sites with an N-terminal histag. BL21(DE3) cells transformed with the plasmid were grown in  
744 Luria Broth at 37°C till an OD of 0.6, induced using 1mM IPTG and grown for an additional 5  
745 hours at 37°C. The protein was purified using Ni-NTA affinity columns (Qiagen) and subsequently  
746 purified by gel filtration using a HiLoad Superdex 75 pg column (GE). The protein was  
747 concentrated and stored in 10 mM potassium phosphate buffer (pH 7.2). The concentration of the  
748 proteins was measured by BCA assay (ThermoScientific) with BSA as standard.

749 **Tmk activity assay.** Tmk catalyzes the following reaction  $dTMP + ATP \rightleftharpoons dTDP + ADP$ , and  
750 the activity assay was carried out using the spectrophotometric assay as described in <sup>25</sup>. Briefly,  
751 the reaction mixture contained 5mM MgCl<sub>2</sub>, 65mM KCl, 350uM phosphoenolpyruvate (PEP), and  
752 300uM NADH. To obtain K<sub>M</sub> for dTMP, ATP concentration was fixed at 1mM, while dTMP  
753 concentration was varied from 10μM to 500μM. The reaction mix without enzymes was incubated  
754 at 25°C for 5 minutes, and the reaction was initiated by adding 100nM Tmk (final concentration)



755 and 2 units of pyruvate/lactate dehydrogenase. The kinetic traces were recorded for every 5  
756 seconds for a total time of 1 minute. The data corresponding to the first 20 seconds were fitted to  
757 a linear model to obtain initial rates. To obtain  $K_I$  of dCTP for Tmk, ATP and dTMP concentrations  
758 were fixed at 100 $\mu$ M and 1mM respectively, while dCTP concentration was varied from 0.5mM  
759 to 7.5mM. Since conversion of dUMP to dTDP also produces ADP, the  $K_I$  of dUMP could not be  
760 estimated by the spectrophotometric method. Instead, dTDP amounts produced in the reaction  
761 were determined by LC-MS. For the reaction, ATP and dTMP concentrations were fixed at 1mM  
762 and 100 $\mu$ M respectively, while dUMP concentration was varied from 0.25mM to 5mM. The  
763 reaction was quenched at 40 seconds using 80% MeOH. The resulting samples were subjected to  
764 LC-MS analysis to obtain dTDP levels. For Figure S7D, LC followed by mass spectrometry was  
765 used to directly measure dTDP levels.

766 **Data availability.** All metabolomics data for WT and mutants, as well as WT treated with  
767 Trimethoprim are included in Table S1.

768

## 769 **Supplemental Information**

770 The manuscript contains 9 Supplementary figures (Figure S1-S9) and 1 Supplementary table.

771 **Table S1:** Metabolomics data

772

773 **Figure S1**

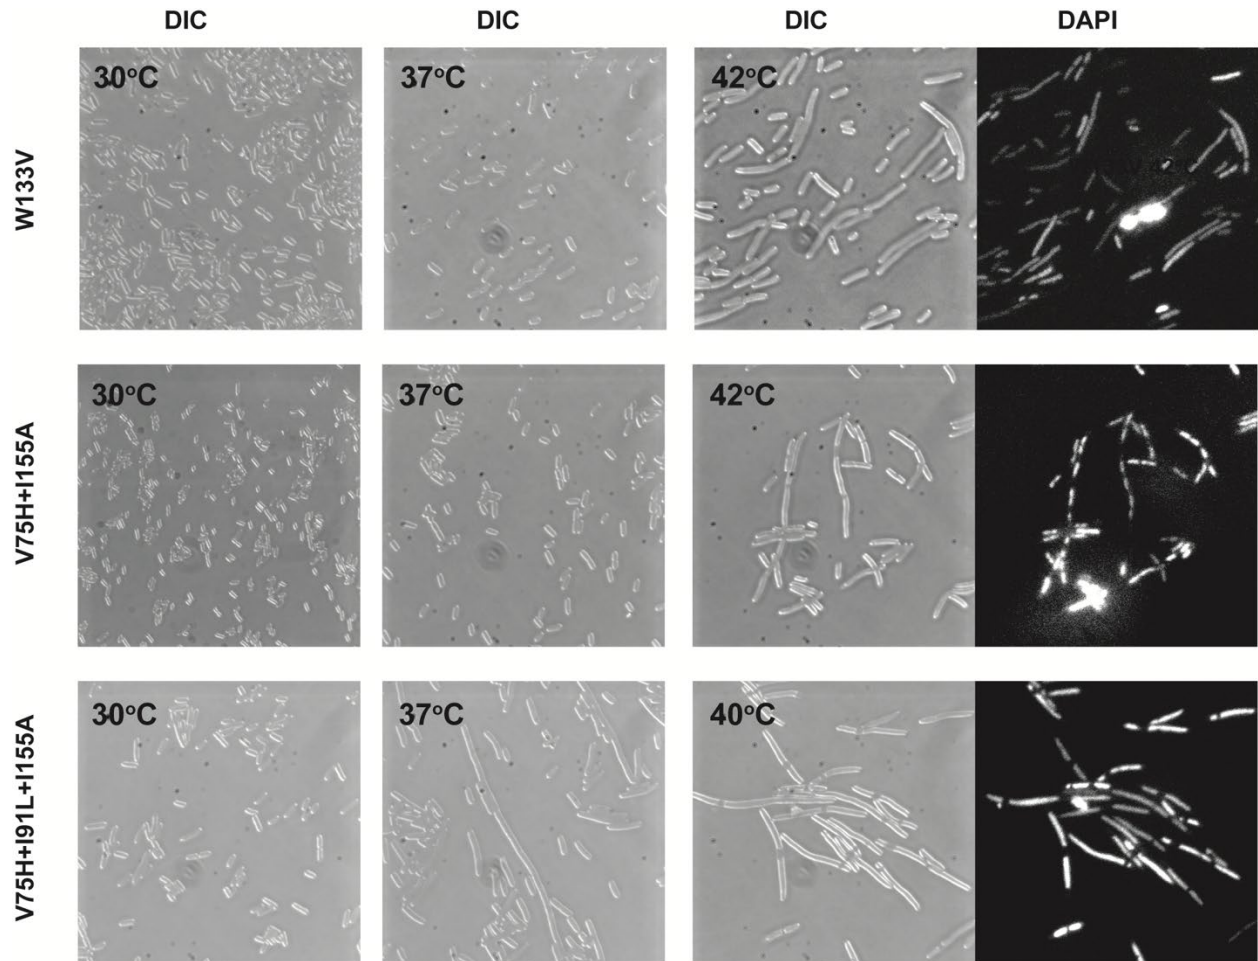

774

775

776 **Figure S1.** Destabilizing mutations in DHFR induce filamentous phenotype. Live cells DIC  
777 images with DAPI nucleoids staining of W133V, V75H+I155A, and V75H+I91L+I155A DHFR  
778 *E. coli* MG1655 strains. Prior to microscopy, cells were grown at 30°C, 37°C, and 42°C  
779 (V75H+I91L+I155A was grown at 40°C) in amino acid supplemented M9 medium for 4 hours  
780 (see *Materials and Methods*).

781

782 **Figure S2**

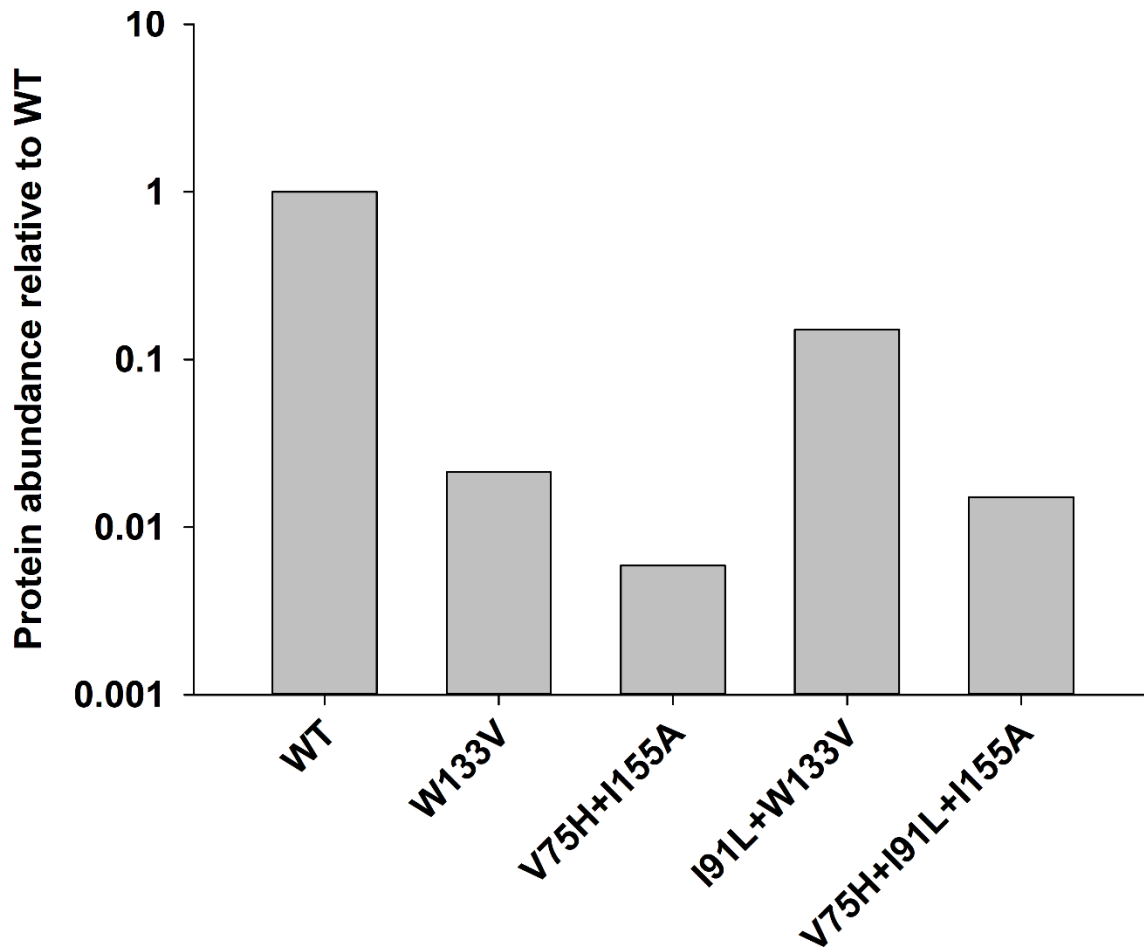

783

784

785 **Figure S2.** Intracellular abundance of WT and mutant DHFRs measured by Western blot. WT,  
786 W133V and V75H+I155A were grown for 4 hours at 42°C while I91L+W133V and  
787 V75H+I91L+I155A strains were grown for 4 hours at 40°C in amino acid supplemented M9  
788 medium before being harvested. The data is also reported in <sup>6</sup>.

789

790 **Figure S3**

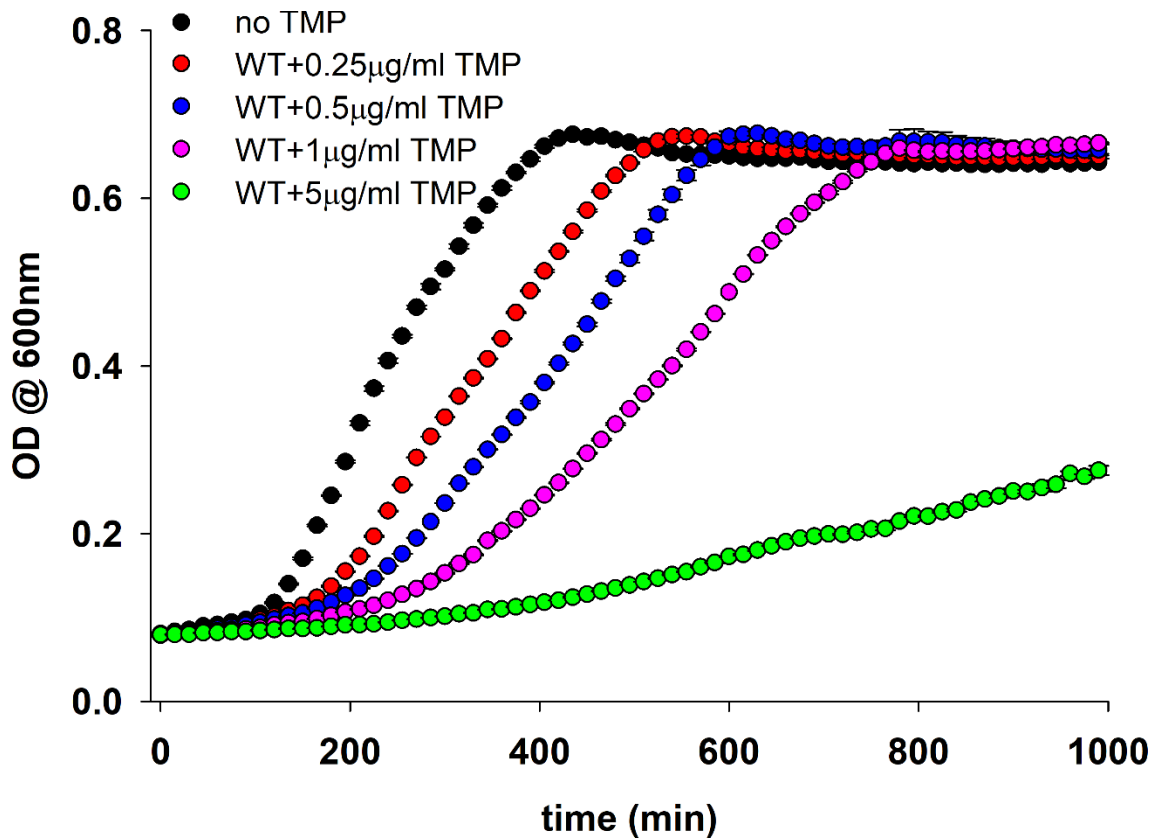

791

792

793 **Figure S3.** The effect of WT DHFR inhibition by trimethoprim (TMP) on growth. WT DHFR  
794 cells were grown at 42°C in amino acid M9 medium, and their growth was monitored by OD at  
795 600nm. The data were fit to a 4-parameter Gompertz equation as described in <sup>44</sup> to derive growth  
796 parameters.

797

798 **Figure S4**

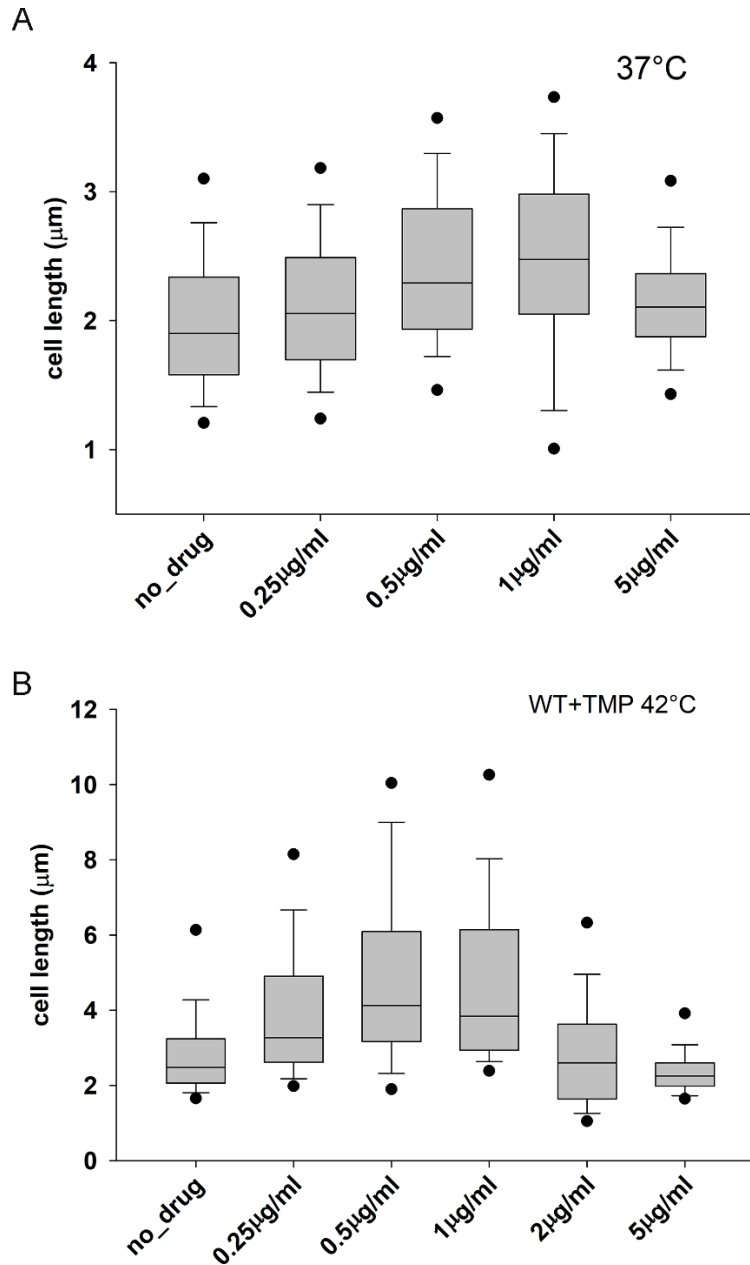

799

800

801 **Figure S4.** Distribution of cell length of WT *E. coli* as a function of TMP concentration when  
802 grown in amino acid supplemented M9 medium at (A) 37°C and (B) 42°C. Concentrations of TMP  
803 slightly below or near the MIC (1 $\mu\text{g/ml}$ ) results in maximum filamentation, while the effect dies  
804 down at higher concentrations. Filamentation is much more pronounced at 42°C than at 37°C.

805

806

807 **Figure S5A**

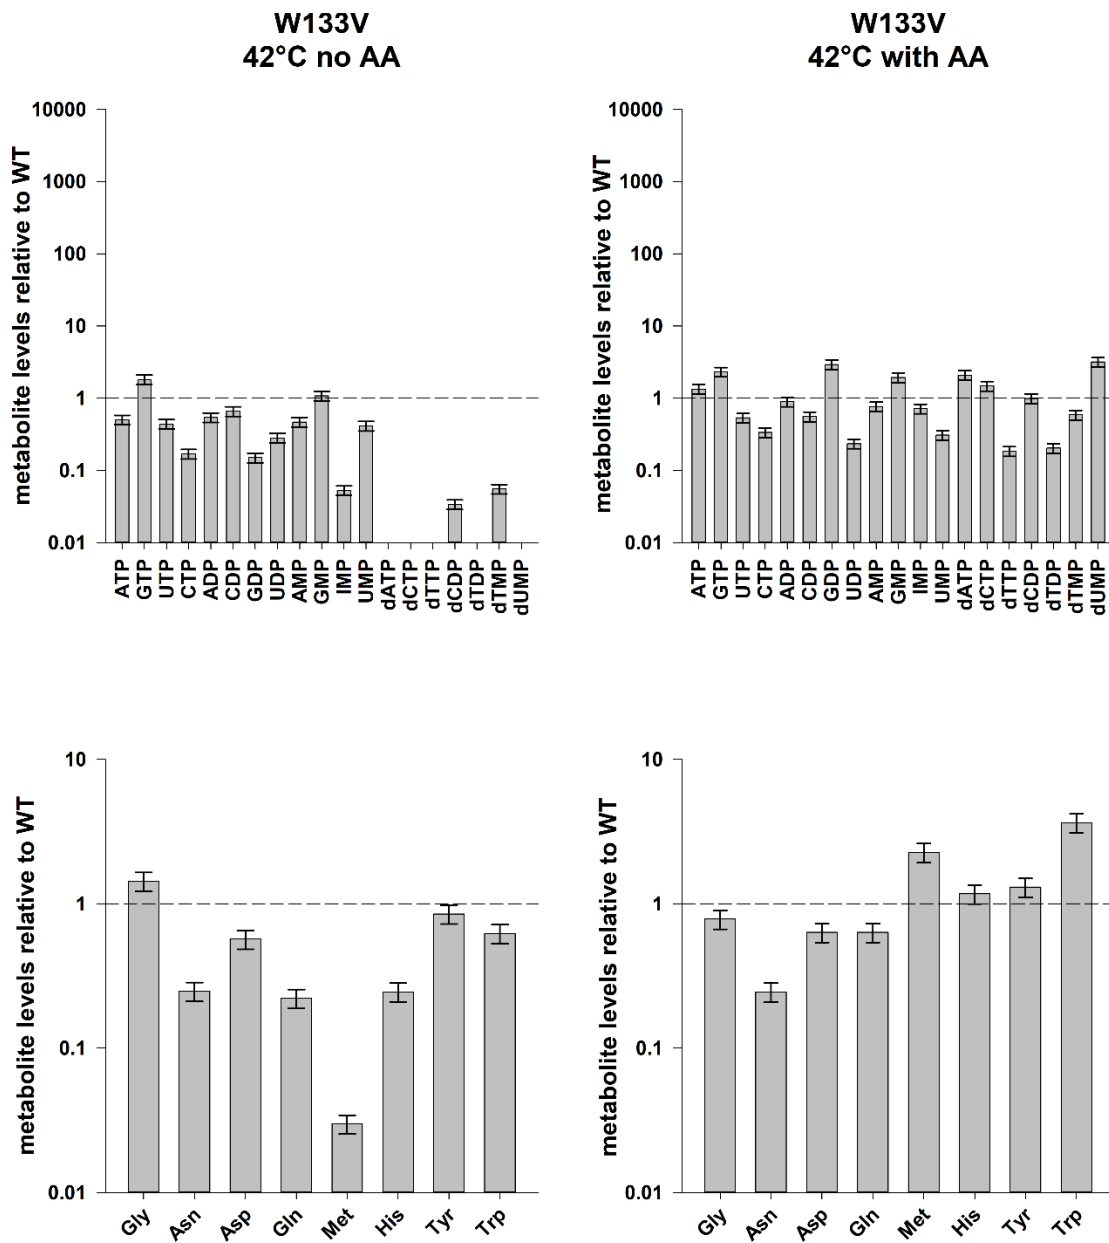

808  
809

810

811 **Figure S5B**

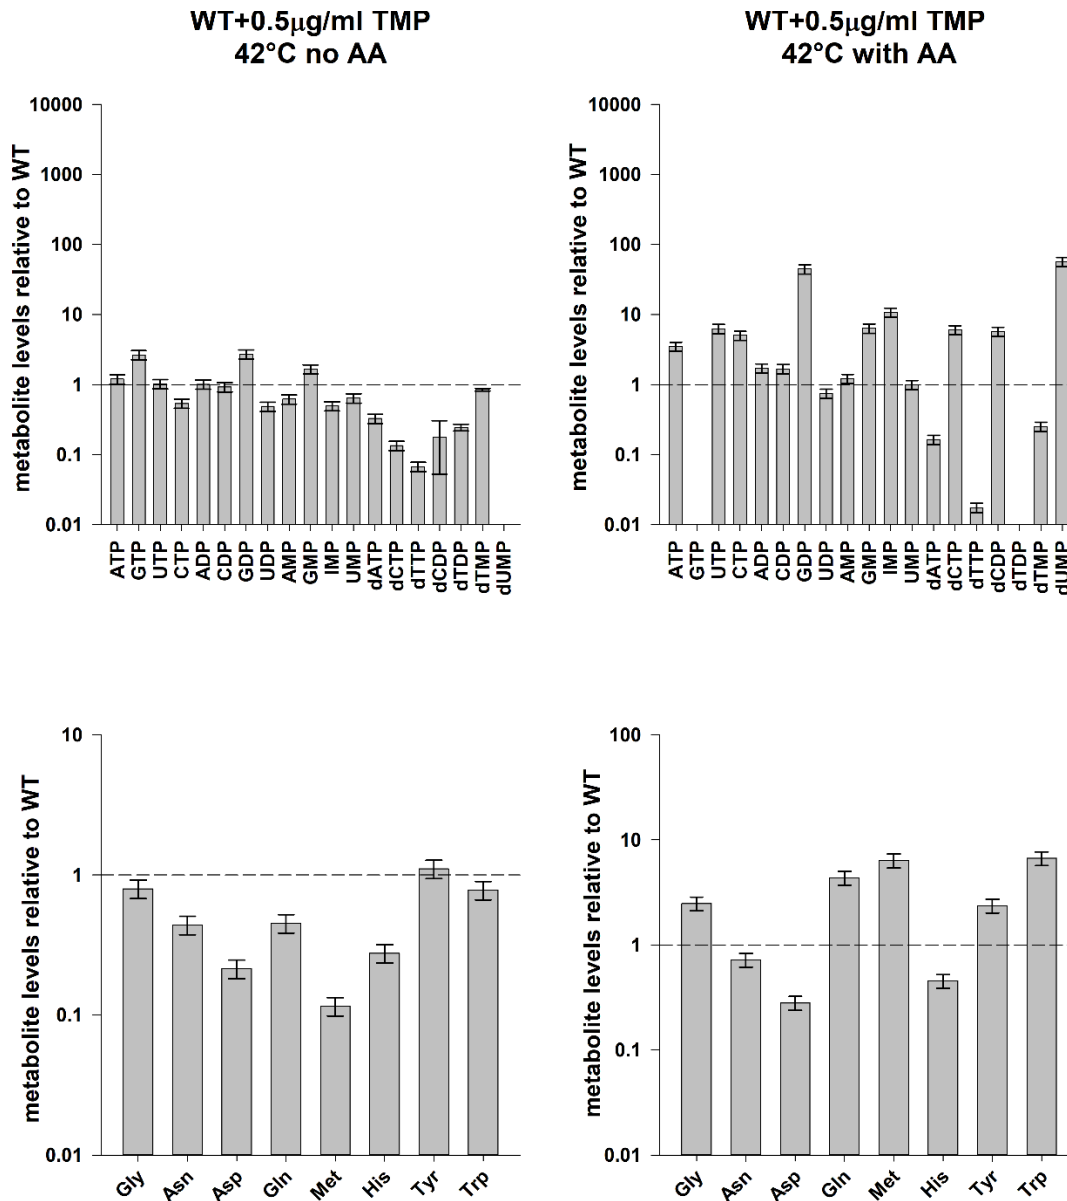

812

813

814 **Figure S5.** Metabolomics of (A) W133V DHFR strain and (B) WT treated with 0.5µg/ml  
 815 Trimethoprim in minimal media at 42°C with or without added amino acids. The bars represent  
 816 abundance of selected nucleotides and amino acids after 4 hours of growth in the indicated  
 817 medium. Concentration of all metabolites were normalized to WT levels when grown under similar  
 818 conditions. For both (A) and (B), methionine levels were extremely low in the absence of amino  
 819 acids, which rise substantially when grown in the presence of amino acids. Though purines and  
 820 pyrimidines also improve with amino acid supplementation, dTDP and dTTP levels remain poor.

821 **Figure S6**

A

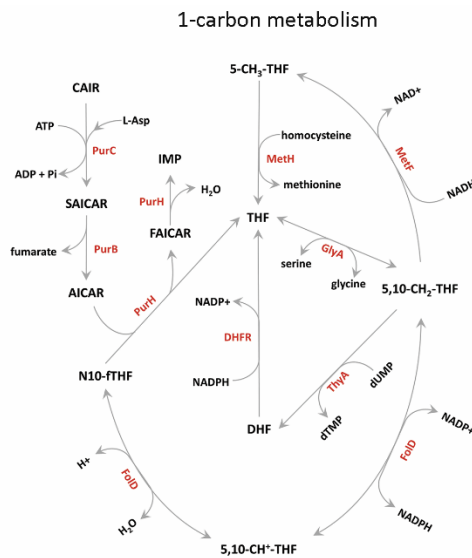

B

Purine biosynthesis pathway

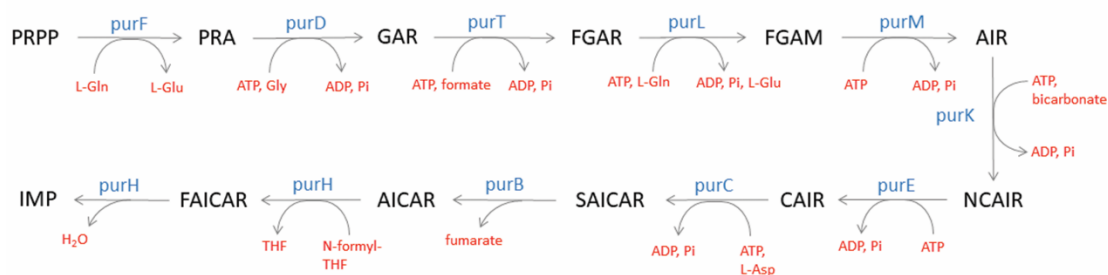

C

Pyrimidine biosynthesis pathway

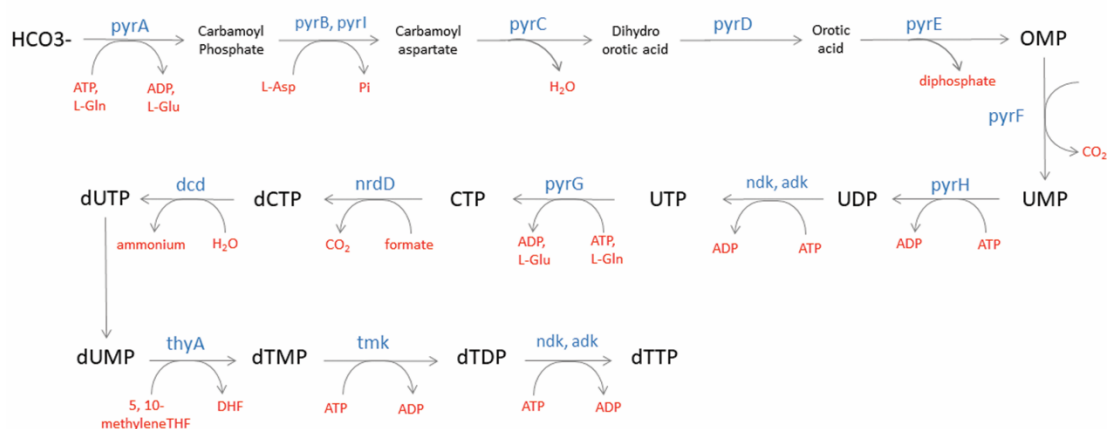

822

823 **Figure S6.** Schematic representation of (A) 1-carbon metabolism metabolism pathway (adapted  
 824 from <sup>15</sup>) (B) *de novo* purine biosynthesis pathway and (C) *de novo* pyrimidine biosynthesis  
 825 pathway.



826 **Figure S7**

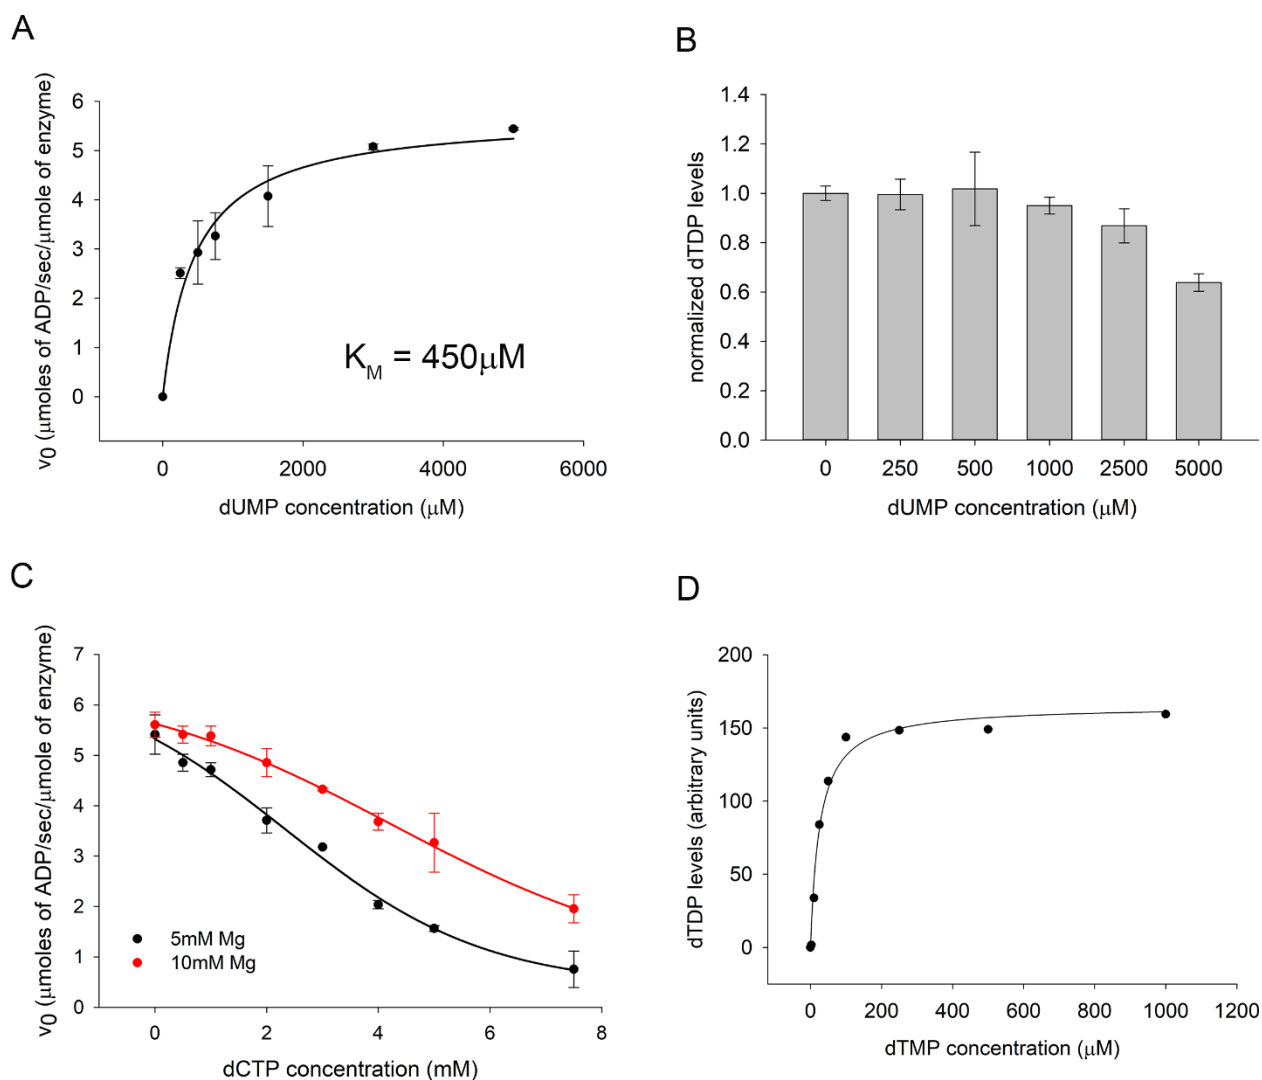

827

828

829 **Figure S7.** (A) Activity assay of purified Tmk enzyme using dUMP as substrate. ATP  
830 concentration is kept saturating at 1mM. The  $K_M$  for dUMP is 450 $\mu$ M, compared to 13 $\mu$ M for  
831 dTMP. (B) Activity assay of Tmk was carried out in the presence of 100mM dTMP and 1mM  
832 ATP, and varying concentration of the inhibitor dUMP. dTDP levels were measured by HPLC  
833 followed by mass spectrometry. The data was fitted with a 4-parameter sigmoid curve to obtain an  
834 apparent  $K_I$  of 3.9mM for dUMP. (C) Activity assay of Tmk was carried out in the presence of  
835 100mM ATP and 1mM dTMP, and varying concentration of dCTP. ADP levels were measured  
836 using a NADH based coupled spectrophotometric assay. The red and black points indicate data  
837 acquired under different concentrations of  $\text{Mg}^{2+}$ . The data were fitted with a 4-parameter sigmoid

838 curve to obtain apparent  $K_I$  of 2.3mM and 4.2mM at 5 and 10mM  $Mg^{2+}$  concentrations  
839 respectively. (D) Activity assay of purified Tmk as a function of dTMP concentration in the  
840 presence of 5mM dUMP and 2.5mM dCTP as inhibitors. ATP concentration was kept saturating  
841 at 1mM. The dTDP levels were monitored using HPLC followed by mass-spectrometry. Even in  
842 the presence of inhibitors, the activity data here conforms to MM kinetics.  
843

844 **Figure S8**

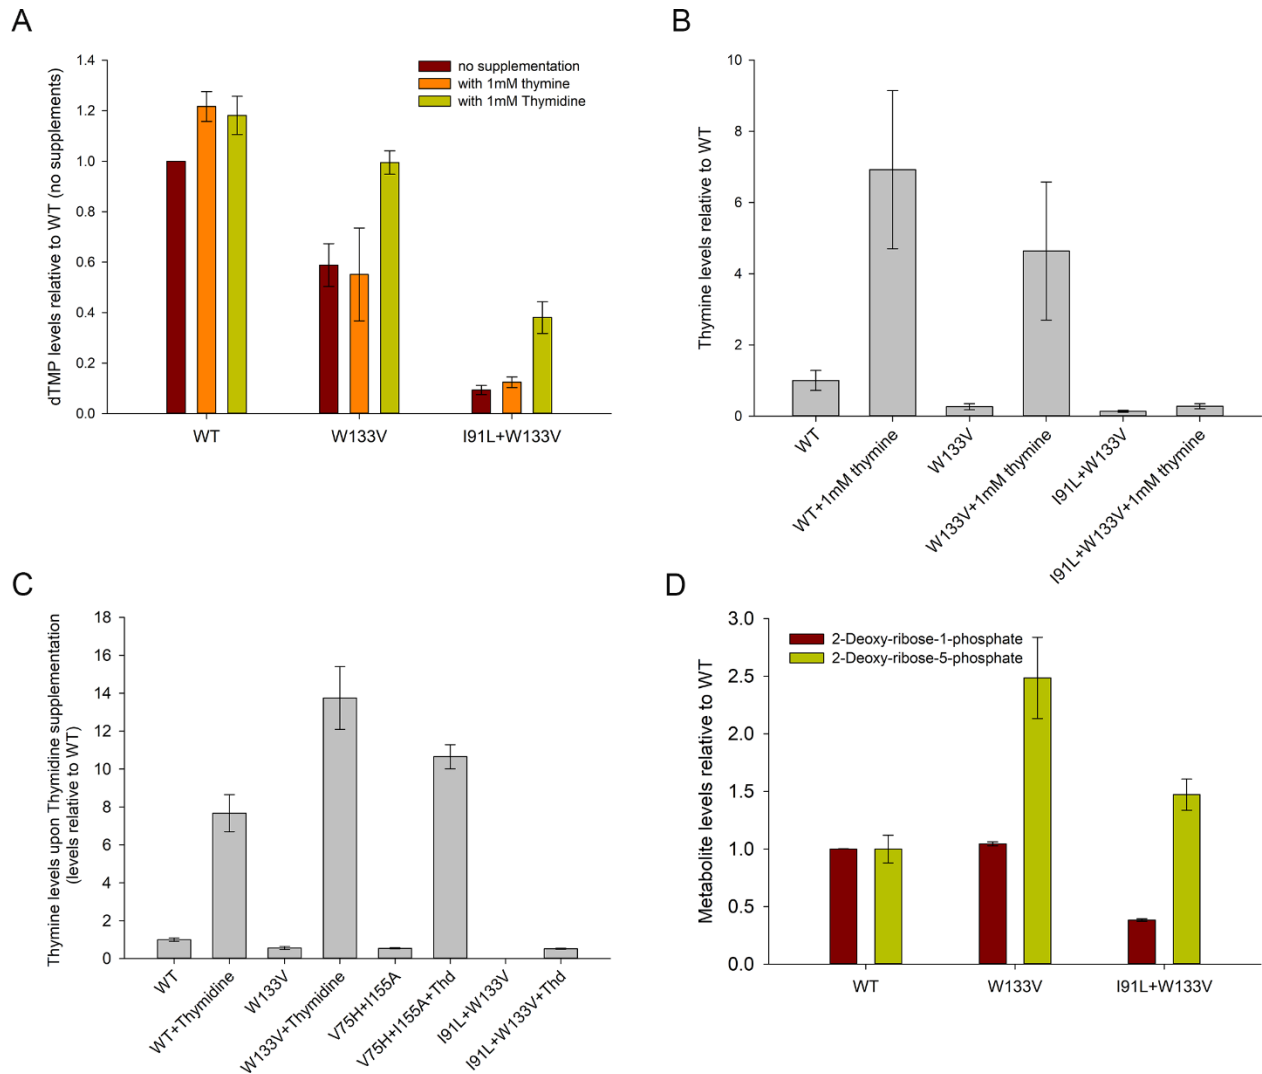

845

846

847 **Figure S8.** dTMP production through pyrimidine salvage pathway using thymidine and thymine

848 supplementation. (A) Intracellular dTMP levels in WT and mutant strains upon addition of 1mM

849 thymine or thymidine to the growth medium. Values are relative to those in WT strain (without

850 any metabolite addition) after 4 hours of growth. Mutants show improvement in dTMP levels only

851 upon thymidine addition. (B) Intracellular thymine levels in WT and mutant strains increase when

852 grown in the presence of 1mM thymine in the medium, indicating that it is up taken by the cells.

853 (C) Intracellular thymine levels in WT and mutant cells following growth with thymidine

854 supplementation. Increase in thymine levels indicates substantial degradation of thymidine in the

855 salvage pathway through DeoA enzyme. (D) Intracellular 2-deoxy-ribose-1-phosphate and 5-

856 phosphate levels in WT and mutant cells. Mutants accumulate substantially high levels of the 5-  
857 phosphate variant, indicating its channeling into energy metabolism.  
858

859 **Figure S9**

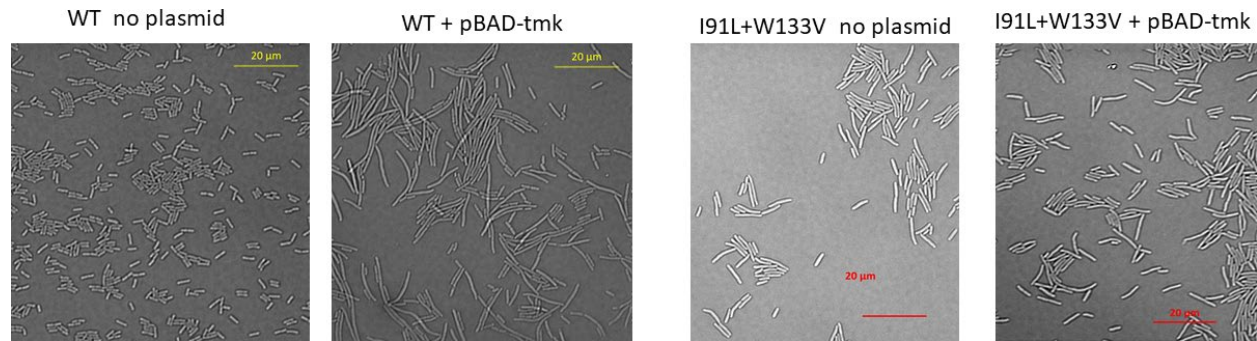

860

861

862 **Figure S9.** DIC images of untransformed WT and I91L+W133V mutant cells as well as those  
863 transformed with pBAD plasmid that expresses Thymidylate Kinase under control of arabinose  
864 promoter. Cells were grown at 42°C for 4 hours (40°C for mutant) in amino acid supplemented  
865 M9 medium in the presence of 0.2% of arabinose. While expression of Tmk does not rescue  
866 filamentation of mutant cells, it produces filamentation of WT cells.

867

## 868 Supplementary Text

### 869 I. Sequential enzymes in pathway with Michaelis-Menten kinetics

870 The following is an example of a pathway where several enzymes work sequentially:

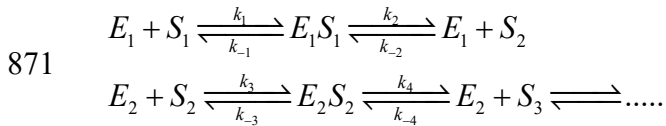

872 For the pathway at steady state, the concentrations of the reactants, products and intermediates  
873 do not change with time. Therefore,

$$874 \frac{d[E_1S_1]}{dt} = k_1[E_1][S_1] + k_{-2}[E_1][S_2] - (k_2 + k_{-1})[E_1S_1] = 0 \quad (4)$$

$$875 \frac{d[E_2S_2]}{dt} = k_3[E_2][S_2] + k_{-4}[E_2][S_3] - (k_4 + k_{-3})[E_2S_2] = 0 \quad (5)$$

876 The enzyme concentrations can be written as:

$$877 \begin{aligned} [E_1] &= [E_1]_0 - [E_1S_1] \\ [E_2] &= [E_2]_0 - [E_2S_2] \end{aligned} \quad (6)$$

878  $[S_1], [S_2]$  are the steady state concentrations of two sequential substrates (or products) in the  
879 pathway. Based on equations (4), (5) and (6), we deduce:

$$880 [E_1S_1] = \frac{(k_1[S_1] + k_{-2}[S_2])[E_1]_0}{k_{-1} + k_2 + k_1[S_1] + k_{-2}[S_2]} \quad (7)$$

$$881 [E_2S_2] = \frac{(k_3[S_2] + k_{-4}[S_3])[E_2]_0}{k_{-3} + k_4 + k_3[S_2] + k_{-4}[S_3]} \quad (8)$$

$$882 \text{ Again, at steady state, } \frac{d[E_1]}{dt} = 0 = -k_1[E_1][S_1] + k_{-1}[E_1S_1] - k_2[E_1][S_2] + k_2[E_1S_1] \quad (9)$$

$$883 \text{ Hence, } [E_1] = \frac{(k_2 + k_{-1})[E_1S_1]}{k_1[S_1] + k_{-2}[S_2]} \quad (10)$$

884 Similarly, one can show that:

$$885 [E_2] = \frac{(k_4 + k_{-3})[E_2S_2]}{k_3[S_2] + k_{-4}[S_3]} \quad (11)$$

886 Since the pathway is at steady state, concentrations of reactants and products of every reaction  
887 remain unchanged with time, hence

888 
$$\frac{d[S_2]}{dt} = k_2[E_1S_1] - k_{-2}[E_1][S_2] + k_{-3}[E_2S_2] - k_3[E_2][S_2] = 0 \quad (12)$$

889 Using the expressions of  $[E_1]$ ,  $[E_2]$ ,  $[E_1S_1]$  and  $[E_2S_2]$  from equations (7), (8), (10) and (11) into  
890 equation (12),

891 
$$[E_1S_1] \left[ k_2 - \frac{k_{-2}[S_2](k_2 + k_{-1})}{k_1[S_1] + k_{-2}[S_2]} \right] + [E_2S_2] \left[ k_{-3} - \frac{k_3[S_2](k_4 + k_{-3})}{k_3[S_2] + k_{-4}[S_3]} \right] = 0$$

892 
$$[E_1]_0 \frac{k_1k_2[S_1] - k_{-1}k_{-2}[S_2]}{k_{-1} + k_2 + k_1[S_1] + k_{-2}[S_2]} = [E_2]_0 \frac{k_3k_4[S_2] - k_{-3}k_{-4}[S_3]}{k_{-3} + k_4 + k_3[S_2] + k_{-4}[S_3]} \quad (13)$$

893 Using  $K_{M1} = \frac{k_2 + k_{-1}}{k_1}$ ,  $K_{M2'} = \frac{k_2 + k_{-1}}{k_{-2}}$ ,  $K_{M2} = \frac{k_4 + k_{-3}}{k_3}$ ,  $K_{M3} = \frac{k_4 + k_{-3}}{k_{-4}}$ , where  $K_{M1}$  is the  
894 Michaelis constant of  $E_1$  for  $S_1$ ,  $K_{M2'}$  is that of  $E_1$  for  $S_2$ ,  $K_{M2}$  is that of  $E_2$  for  $S_2$  and  $K_{M3}$  is that  
895 of  $E_2$  for  $S_3$ , equation (13) can be written as:

896 
$$[E_1]_0 \frac{k_2[S_1]/K_{M1} - k_{-1}[S_2]/K_{M2'}}{1 + [S_1]/K_{M1} + [S_2]/K_{M2'}} = [E_2]_0 \frac{k_4[S_2]/K_{M2} - k_{-3}[S_3]/K_{M3}}{1 + [S_2]/K_{M2} + [S_3]/K_{M3}} \quad (14)$$

897 Assuming that  $K_{M2'}, K_{M3} \gg K_{M1}, K_{M2}$  (in other words if  $k_{-2}$  and  $k_{-4}$  are very small) or the  
898 products have very low affinity back towards the enzyme, equation (14) reduces to the  
899 following:

900 
$$[E_1]_0 \frac{k_2[S_1]}{K_{M1} + [S_1]} = [E_2]_0 \frac{k_4[S_2]}{K_{M2} + [S_2]} \quad (15)$$

901 Equation (15) can be re-arranged to get the following hyperbolic or Michaelis-Menten like  
902 dependence of  $S_2$  on  $S_1$ :

903 
$$[S_2] = \frac{k_2K_{M2}[E_1]_0[S_1]}{k_4K_{M1}[E_2]_0 + (k_4[E_2]_0 - k_2[E_1]_0)[S_1]} = \frac{A[S_1]}{B + C[S_1]}, \quad (16)$$

904 Where  $A = k_2K_{M2}[E_1]_0$ ,  $B = k_4K_{M1}[E_2]_0$ ,  $C = (k_4[E_2]_0 - k_2[E_1]_0)$

905

## 906 II. Sequential enzymes in pathway with Hill-like kinetics

907 For a single enzyme, initial rate  $v_0 = \frac{v_{\max} [S]^m}{K_M + [S]^m}$ , where ‘ $m$ ’ is the Hill coefficient (1)

908 Now again consider the following scheme of sequential enzymes:

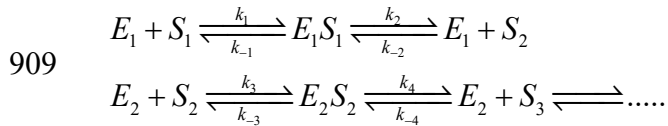

910 For reactants and products to be at steady state, earlier we derive Equation (15), which  
 911 essentially equates the rate of production and consumption of  $S_2$  through the two enzymes (with  
 912 the assumption that  $k_{-2}$  and  $k_{-4}$  are very small). In such a situation if either  $S_1$  or both  $S_1$  and  $S_2$   
 913 have limited diffusion, equation (15) can be written as the following based on equation (1):

914 
$$[E_1]_0 \frac{k_2 [S_1]^m}{K_{M1}^* + [S_1]^m} = [E_2]_0 \frac{k_4 [S_2]^n}{K_{M2}^* + [S_2]^n} \quad (2)$$

915 Where  $m$  and  $n$  are the Hill coefficient analogs of the two consecutive enzymatic steps.

916 Equation (2) can be rearranged as:

917 
$$[S_2]^n = \frac{k_2 K_{M2}^* [E_1]_0 [S_1]^m}{k_4 K_{M1}^* [E_2]_0 + (k_4 [E_2]_0 - k_2 [E_1]_0) [S_1]^m} = \frac{A [S_1]^m}{B + C [S_1]^m} \quad (3)$$

918 Therefore,  $[S_2] = \left[ \frac{A [S_1]^m}{B + C [S_1]^m} \right]^{1/n} \quad (4)$

919 A numerical solution of equation (4) shows that  $S_2$  shows positive cooperativity as a function of

920  $S_1$  only if  $m > n$  (Figure below).



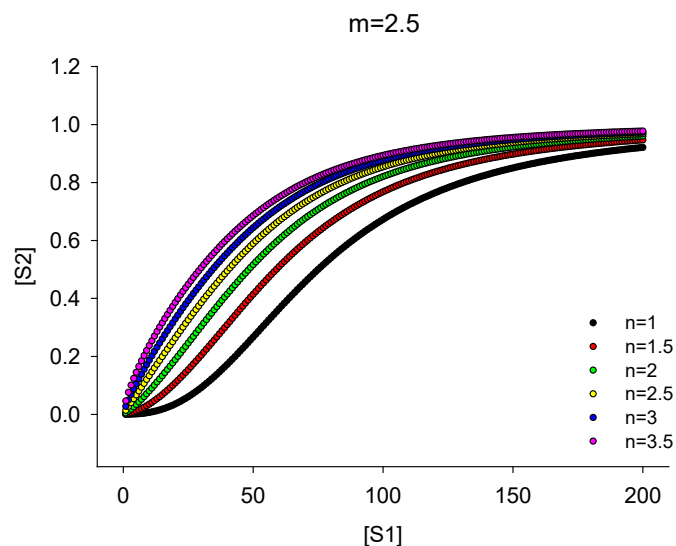

921

922

### 923 III. Power law formalism for fractal kinetics

924 For a system where reactants and products diffuse freely, the rate constant of the reaction is time  
 925 independent. However, under conditions of diffusion limitation (fractal kinetics), rate constant is  
 926 no longer a constant, but varies with time in the following way:

$$927 \quad k = k_0 t^{-h}$$

928 Where  $h$  is related to the fractal dimension of the medium.

929 In the following section, we adopt the power law formalism as shown in <sup>29</sup> to convert the time  
 930 dependent rate constant to a time independent one.

931 Considering the following simple reaction of two molecules of A forming a homodimer under  
 932 conditions of diffusion limitation:

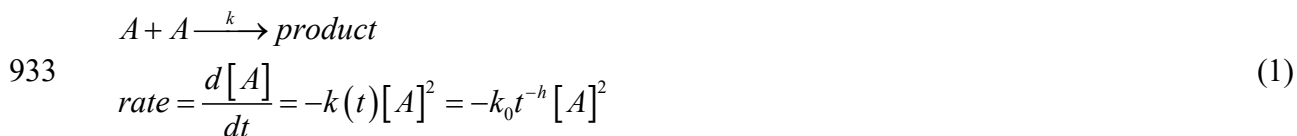

934 Integrating the above equation, we get [A] as a function of time

$$935 \quad [A] = \frac{1-h}{k_0 t^{1-h}} \quad (2)$$

936 Rearranging this, we get

$$937 \quad t = \left( \frac{1-h}{[A]k_0} \right)^{\frac{1}{1-h}} \quad (3)$$

938 In the next step, we replace  $t$  in equation (1) with (3) to get:

$$939 \quad \text{Rate} = -(1-h)^{\frac{h}{1-h}} k_0^{\frac{1}{1-h}} [A]^{2+\frac{h}{1-h}} = -k^* [A]^\alpha \quad (4)$$

940 Where  $\alpha = 2 + \frac{h}{1-h}$  (Note that though this is a bimolecular reaction, the actual molecularity is

941  $>2$  under fractal conditions)

### 942 **Application for enzyme kinetics**

943 Assume the following simple case:

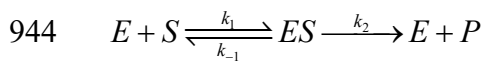

945 Consider that the substrate S is diffusion limited, hence  $k_1$  (a bimolecular rate constant) will be  
946 time dependent.

$$947 \quad \frac{d[ES]}{dt} = k_1(t)[E][S] - (k_{-1} + k_2)[ES] = k_1^*[E][S]^n - (k_{-1} + k_2)[ES]$$

948 Where  $k_1^*$  is the apparent time independent rate constant, and  $n$  is related to the fractal  
949 dimension of the medium.

$$950 \quad \text{At steady state, } \frac{d[ES]}{dt} = 0$$

$$951 \quad \text{Hence, } [ES] = \frac{[E]_0 [S]^n}{\left( \frac{k_2 + k_{-1}}{k_1^*} \right) + [S]^n}$$

$$952 \quad \text{Rate of the reaction } v = k_2 [ES] = \frac{k_2 [E]_0 [S]^n}{\left( \frac{k_2 + k_{-1}}{k_1^*} \right) + [S]^n} = \frac{k_2 [E]_0 [S]^n}{K_M^* + [S]^n}$$

953 Where  $K_M^*$  is the apparent Michaelis constant, and  $n$  is the Hill coefficient analog.

954
